# Supplementary material for: miRbiom: Machine-Learning on Bayesian Causal Nets of RBP-miRNA interactions successfully predicts miRNA profiles
Source: bioRxiv or medRxiv preprint supplement (doi:10.1101/2020.06.18.156851), 2021-09-07
Supplement: Supplementary file [file media-21.pdf]

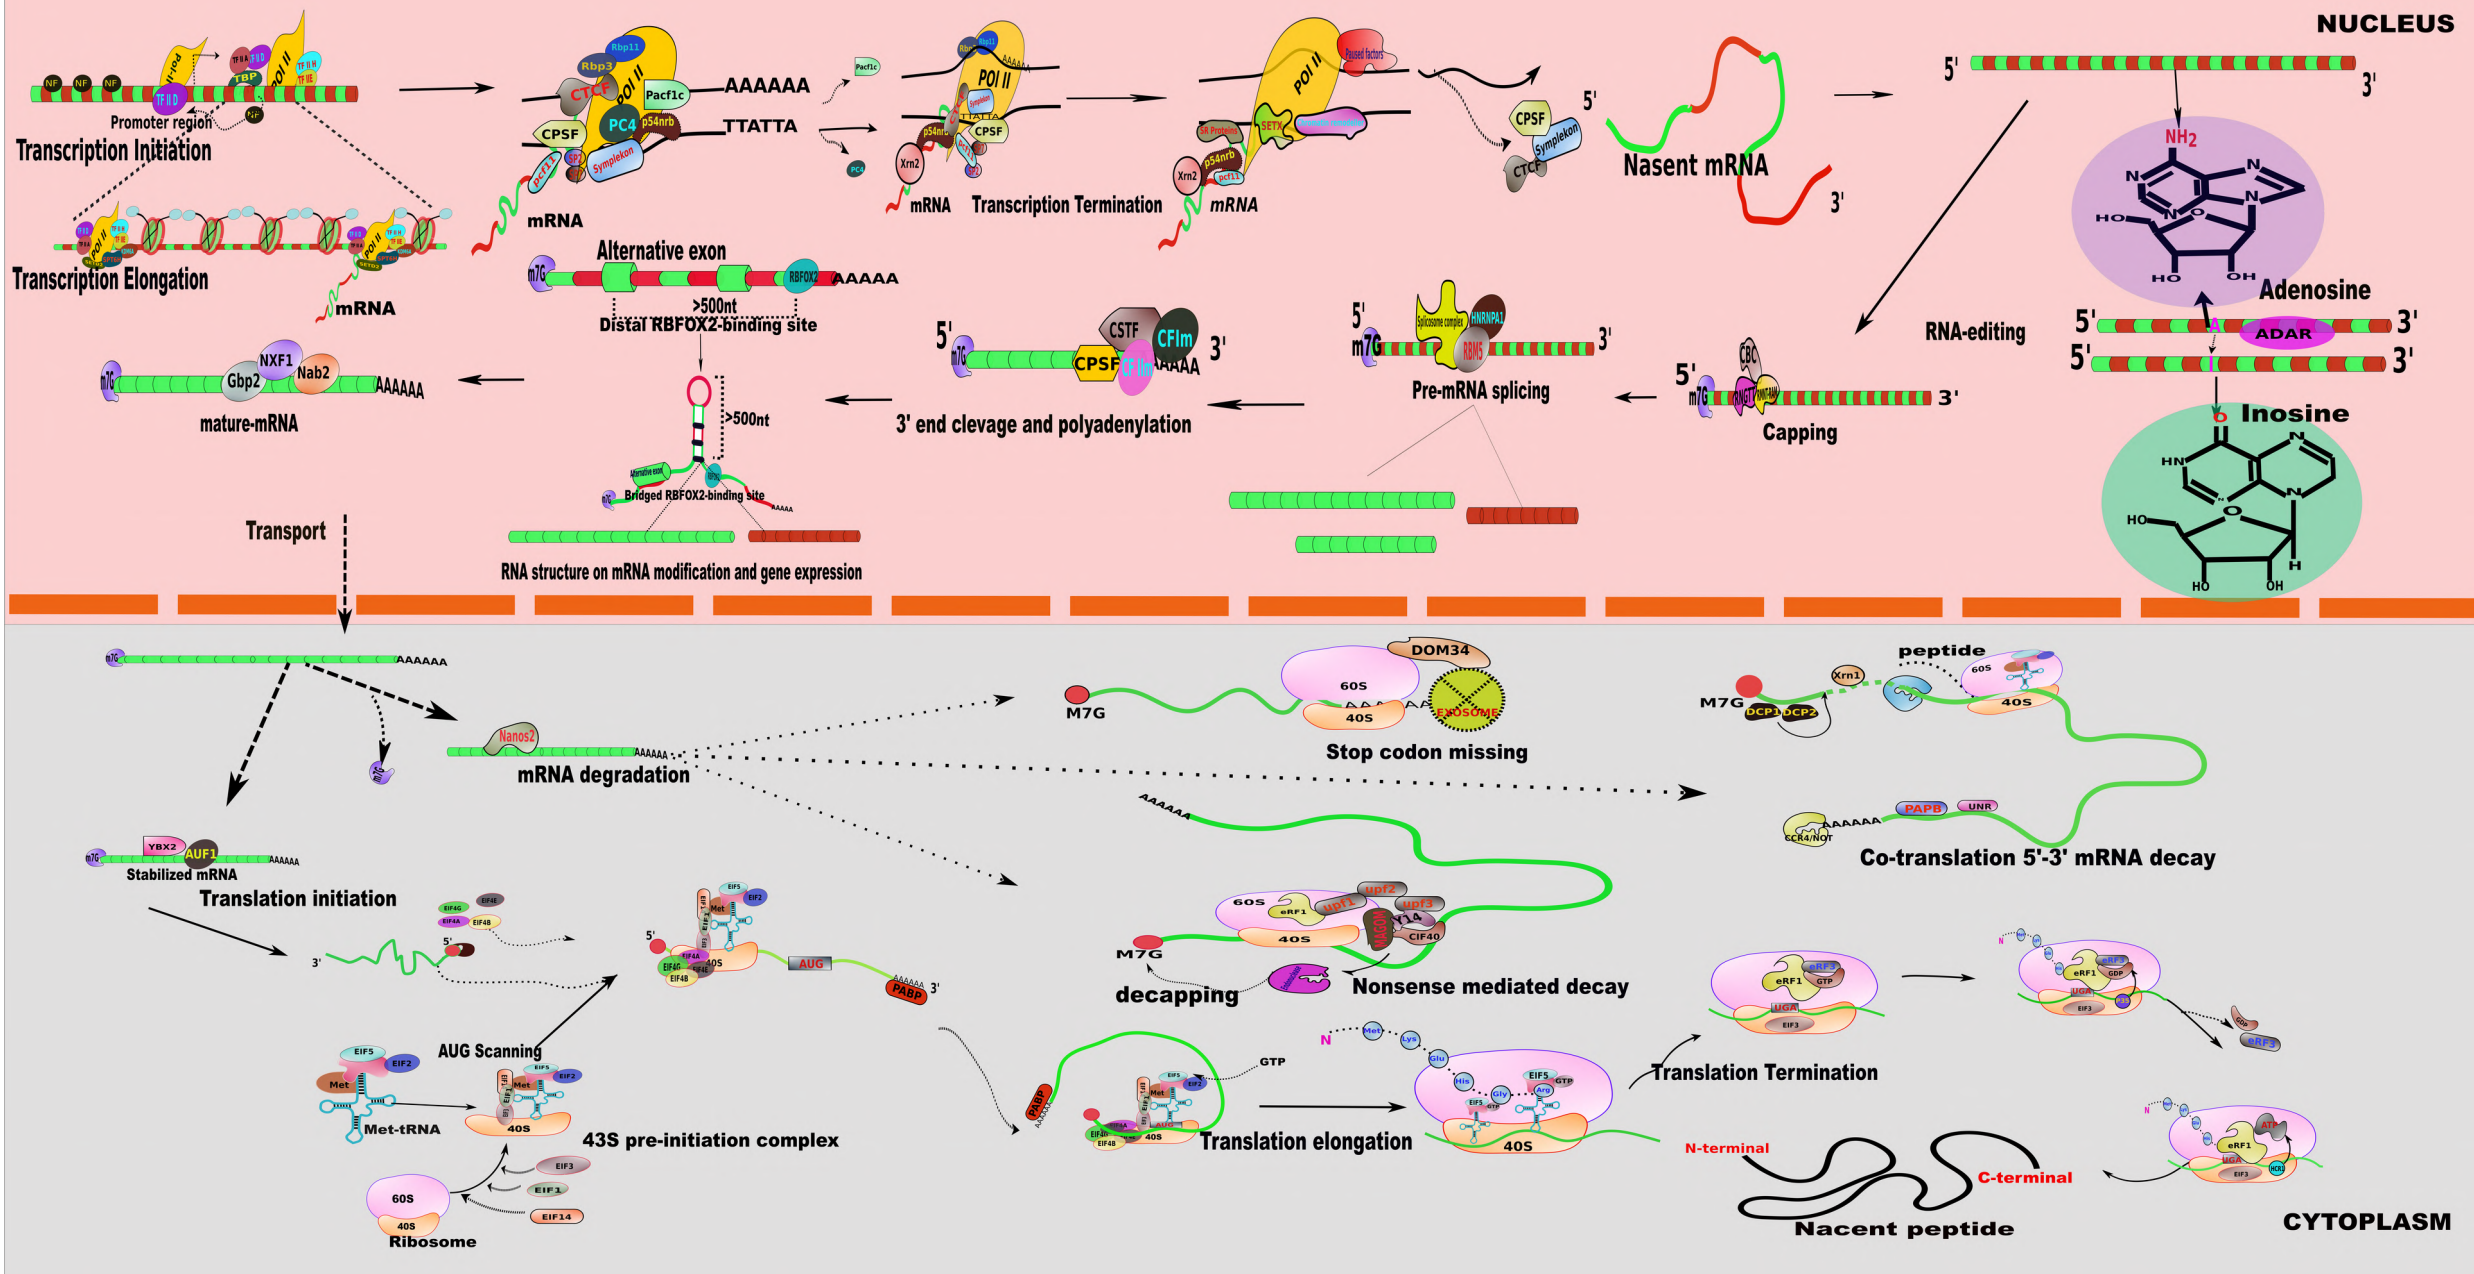

**Figure S1:** Involvement of RBPs from transcription to translation. The above diagram demonstrated the involvement of RBPs in transcription (Initiation to termination), Post-transcriptional modification, translation (Initiation to termination) and mRNA decay process. RBPs play crucial roles in gene expression and regulation.
