# Supplementary material for: miRbiom: Machine-Learning on Bayesian Causal Nets of RBP-miRNA interactions successfully predicts miRNA profiles
Source: bioRxiv or medRxiv preprint supplement (doi:10.1101/2020.06.18.156851), 2021-09-07
Supplement: Supplementary file [file media-22.pdf]

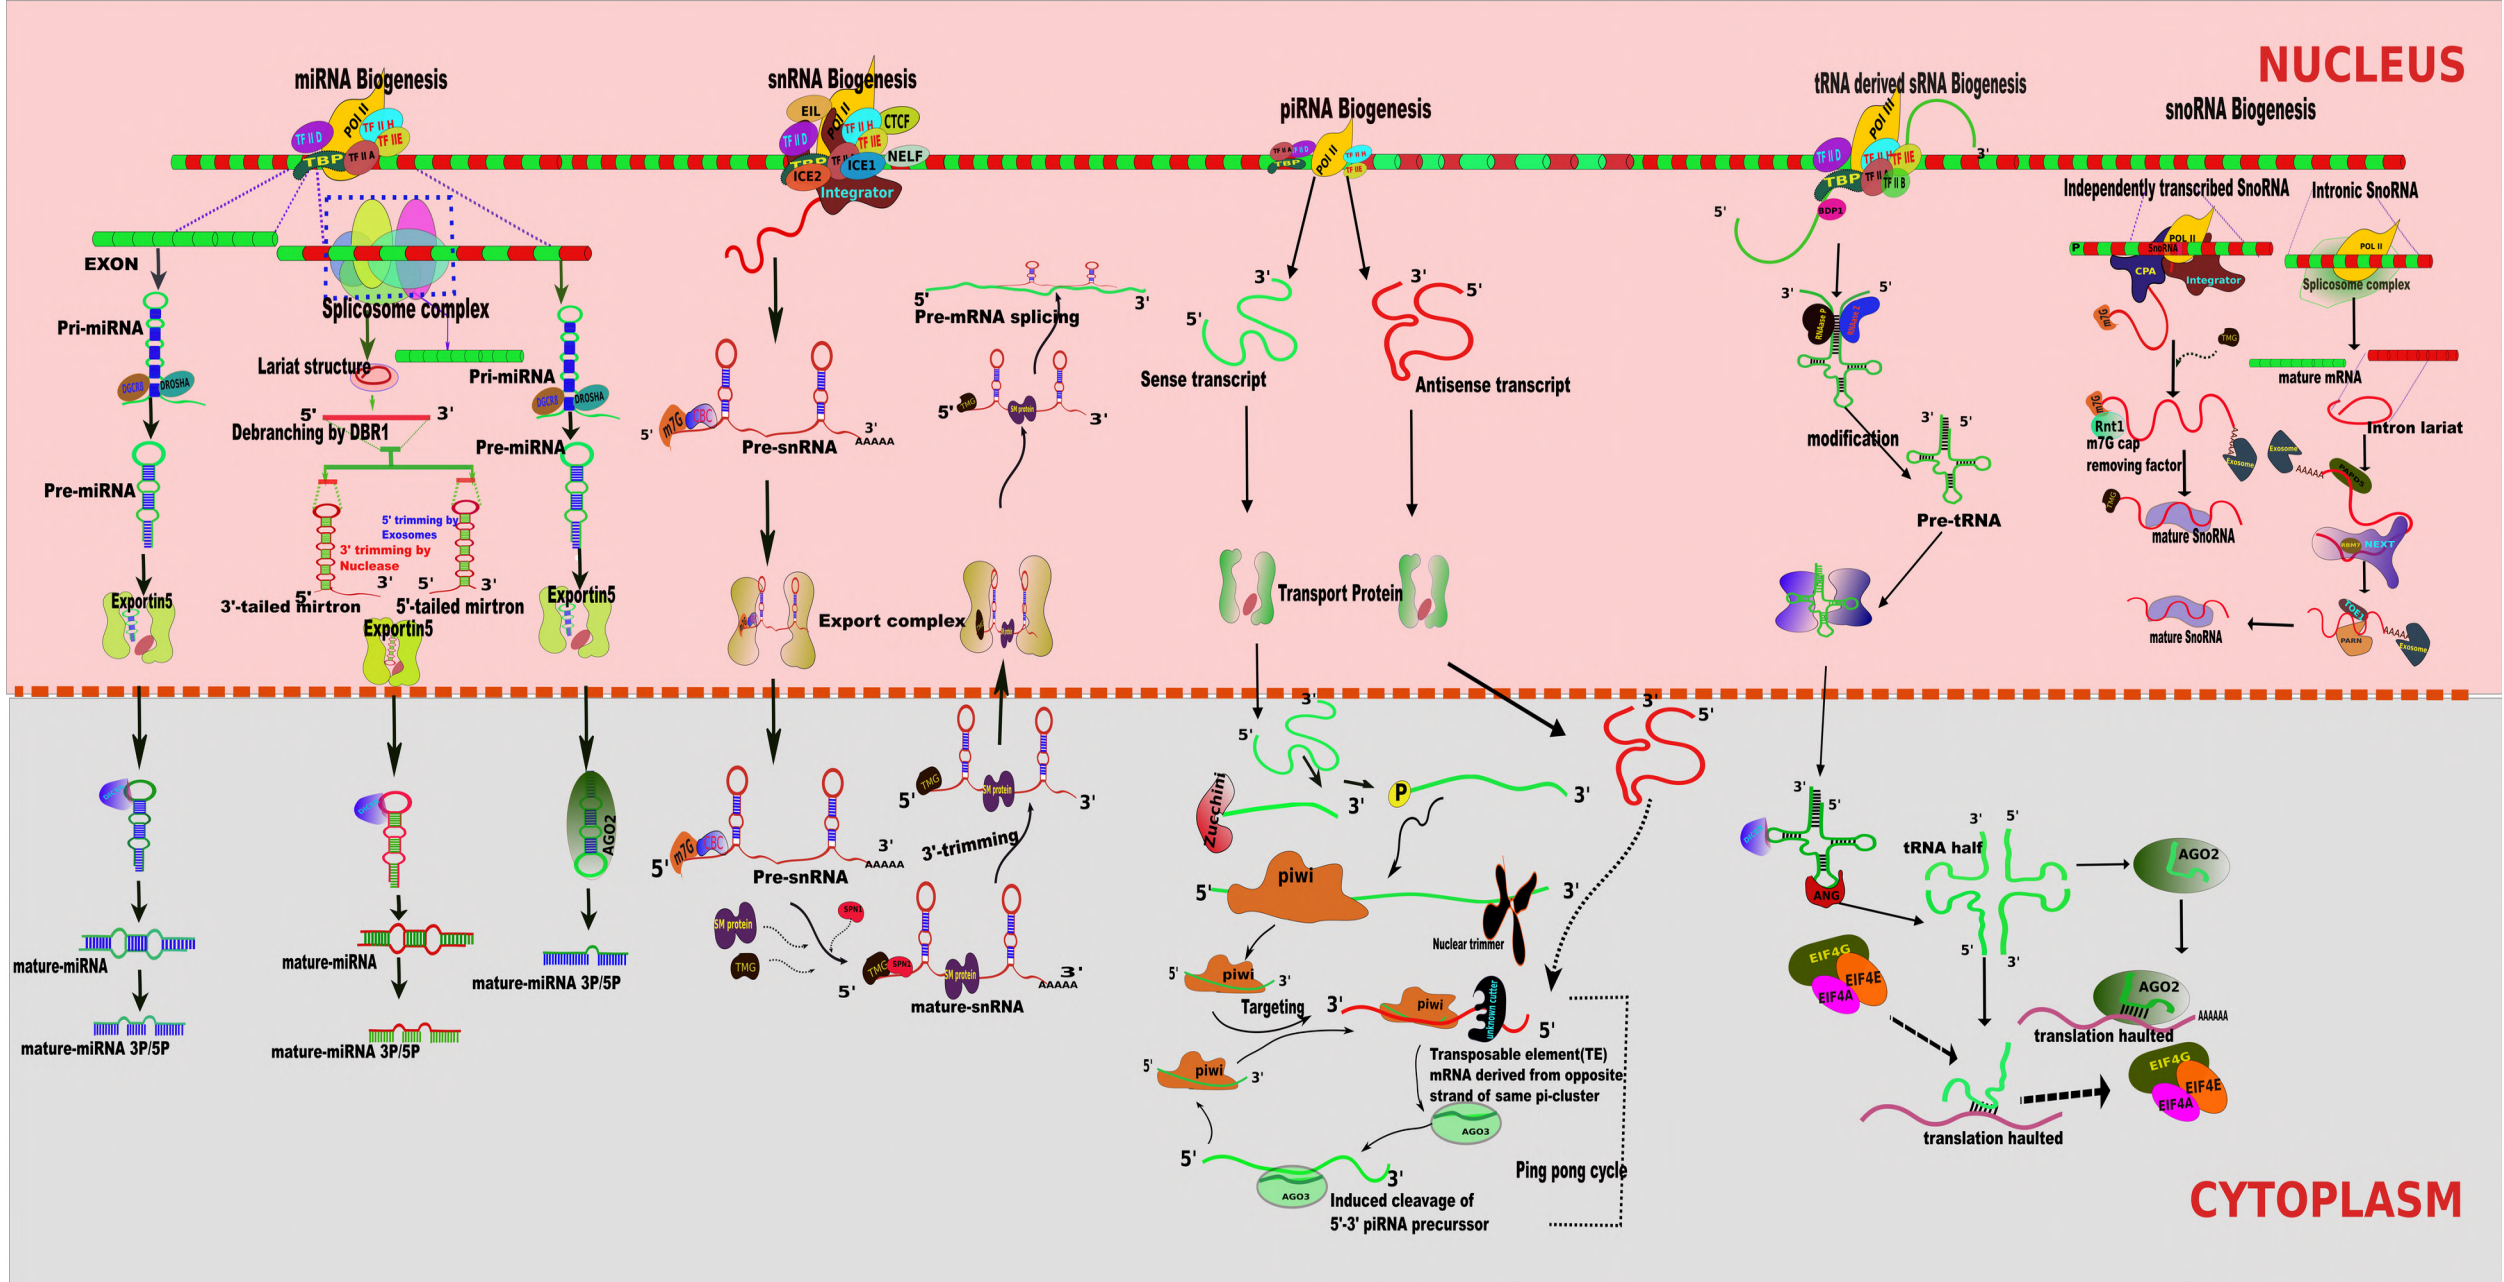

**Figure S2:** Biogenesis of different classes of sRNAs. The above diagram illustrates the biogenesis for different classes of sRNAs. These different classes of regulatory sRNAs also differ in RBPs required for their biogenesis process, the constitution of the argonaute containing complexes that execute their regulatory functions, their modes of gene regulation, and the biological functions in which they participate.
