# Supplementary material for: miRbiom: Machine-Learning on Bayesian Causal Nets of RBP-miRNA interactions successfully predicts miRNA profiles
Source: bioRxiv or medRxiv preprint supplement (doi:10.1101/2020.06.18.156851), 2021-09-07
Supplement: Supplementary file [file media-23.pdf]

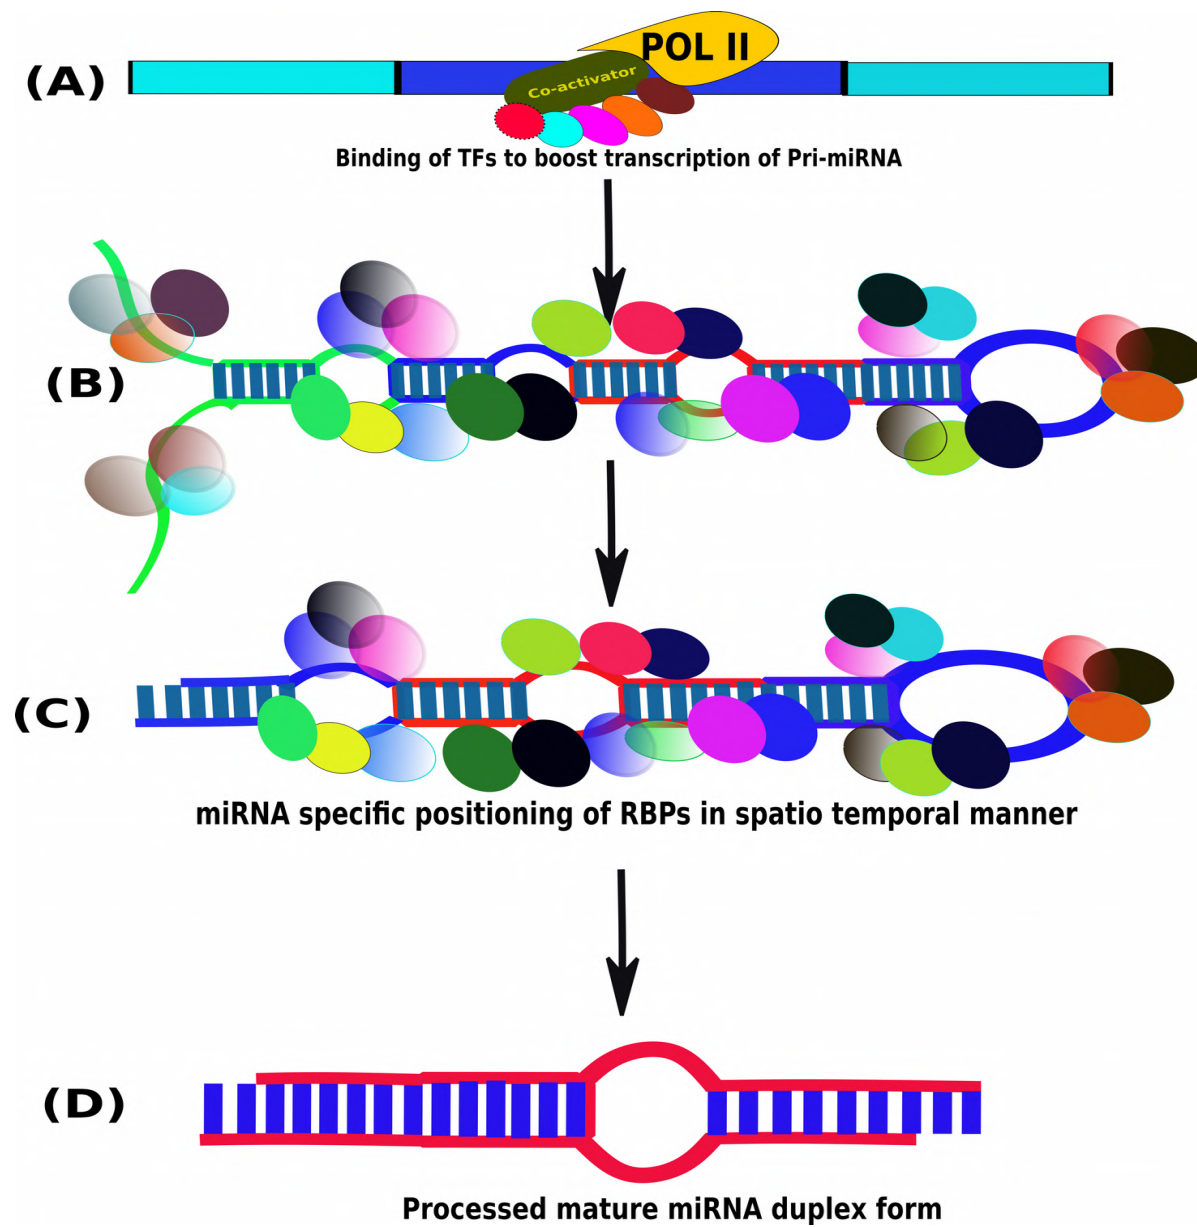

**Figure S3:** Several RBP bindings sites were found across miRNA precursors. (A) The transcription factors bind the genomic sequence, in spatio temporal manner, to promote pri-miRNA transcription. (B) Precursor miRNA sequence contains the regions for binding of various RBPs. (C) RBPs bind the preferred regions and establish interaction with RNA and RNase III enzymes like Drosha-DGCR8 complex or Dicer. This could be a combinatorial process involving various RBPs. D) The processed mature miRNA duplex.
