# Supplementary material for: miRbiom: Machine-Learning on Bayesian Causal Nets of RBP-miRNA interactions successfully predicts miRNA profiles
Source: bioRxiv or medRxiv preprint supplement (doi:10.1101/2020.06.18.156851), 2021-09-07
Supplement: Supplementary file [file media-24.pdf]

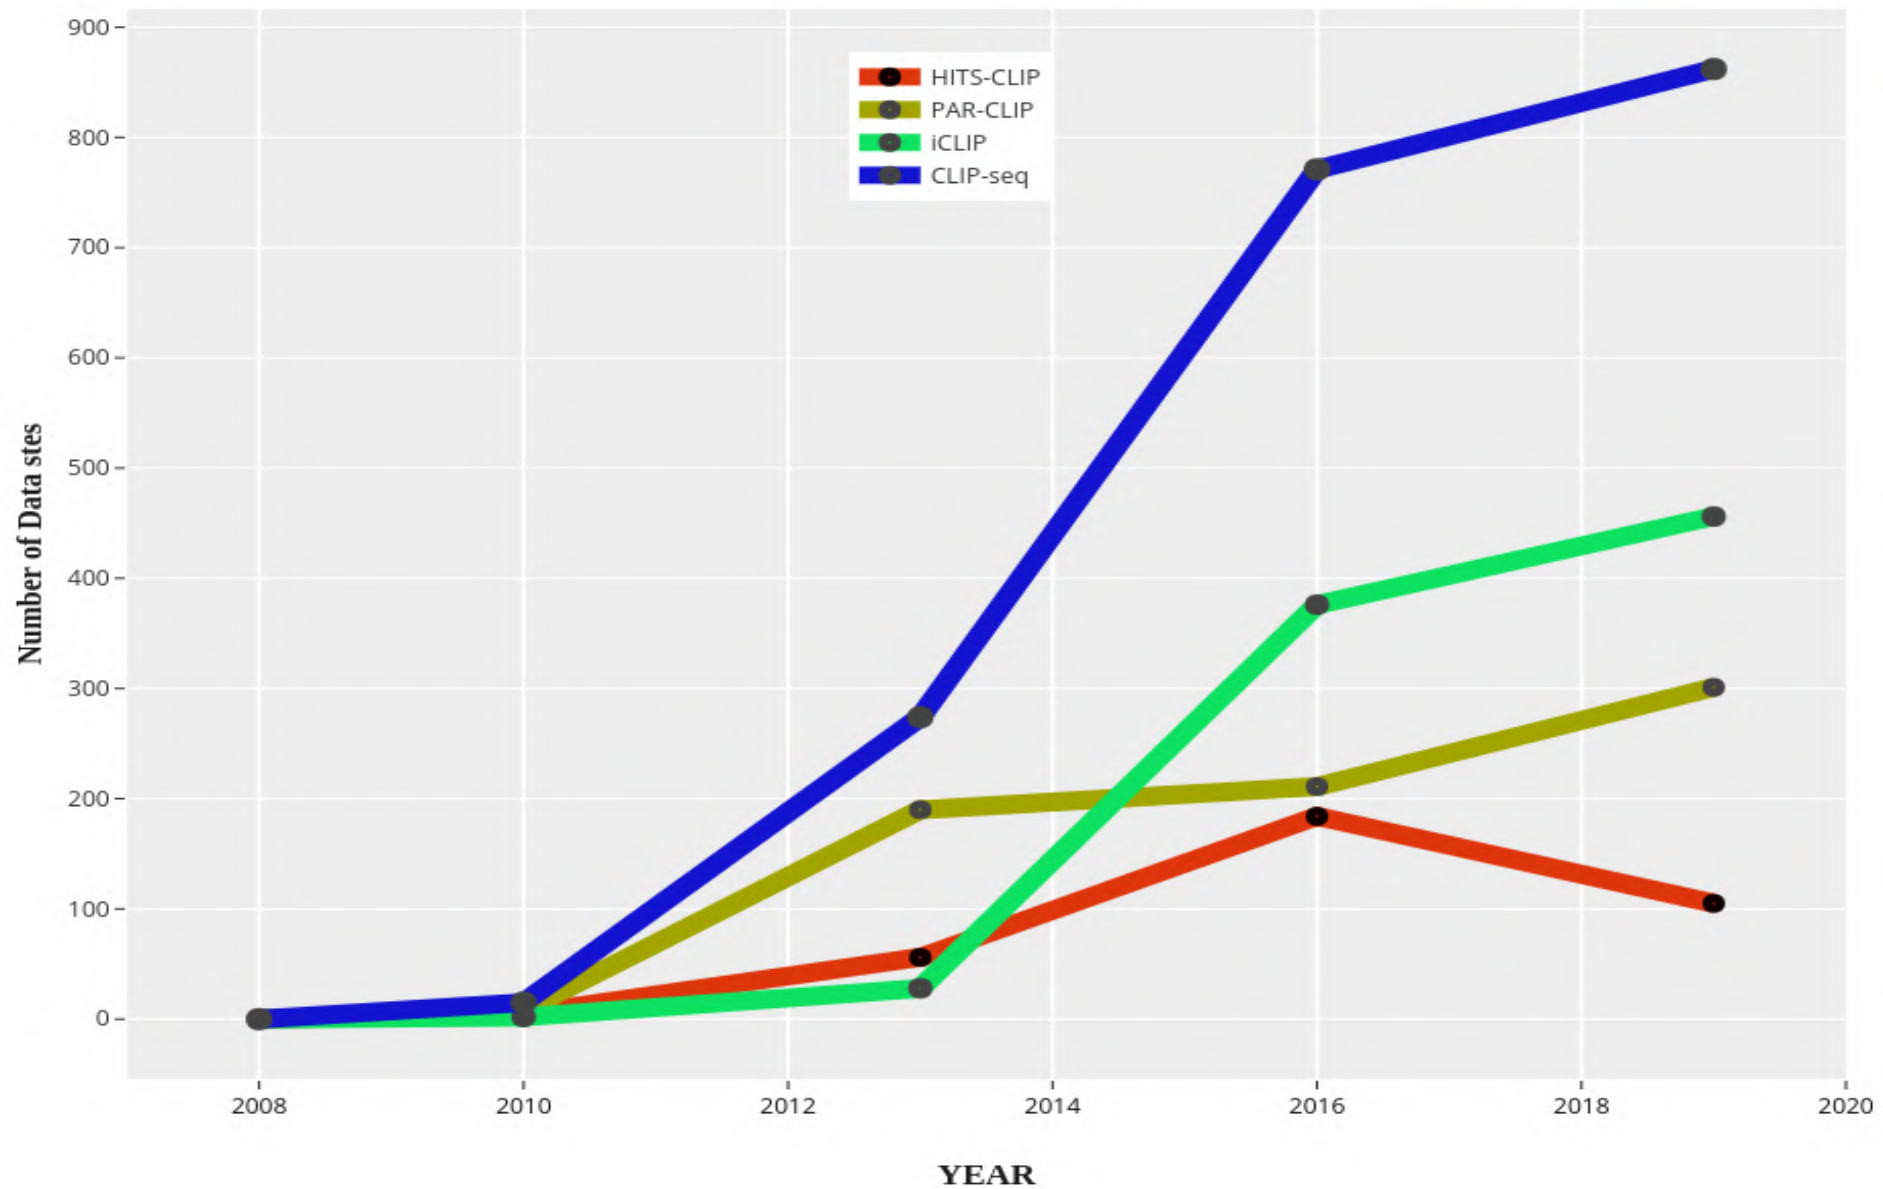

**Figure S4:** Number of CLIP-seq datasets deposited in Gene Expression Omnibus (GEO) database year-wise since 2008. The trend of CLIP-seq data increment in GEO database highlights growing appreciation for importance of RBP-RNA interaction in studies.
