# Supplementary material for: miRbiom: Machine-Learning on Bayesian Causal Nets of RBP-miRNA interactions successfully predicts miRNA profiles
Source: bioRxiv or medRxiv preprint supplement (doi:10.1101/2020.06.18.156851), 2021-09-07
Supplement: Supplementary file [file media-25.pdf]

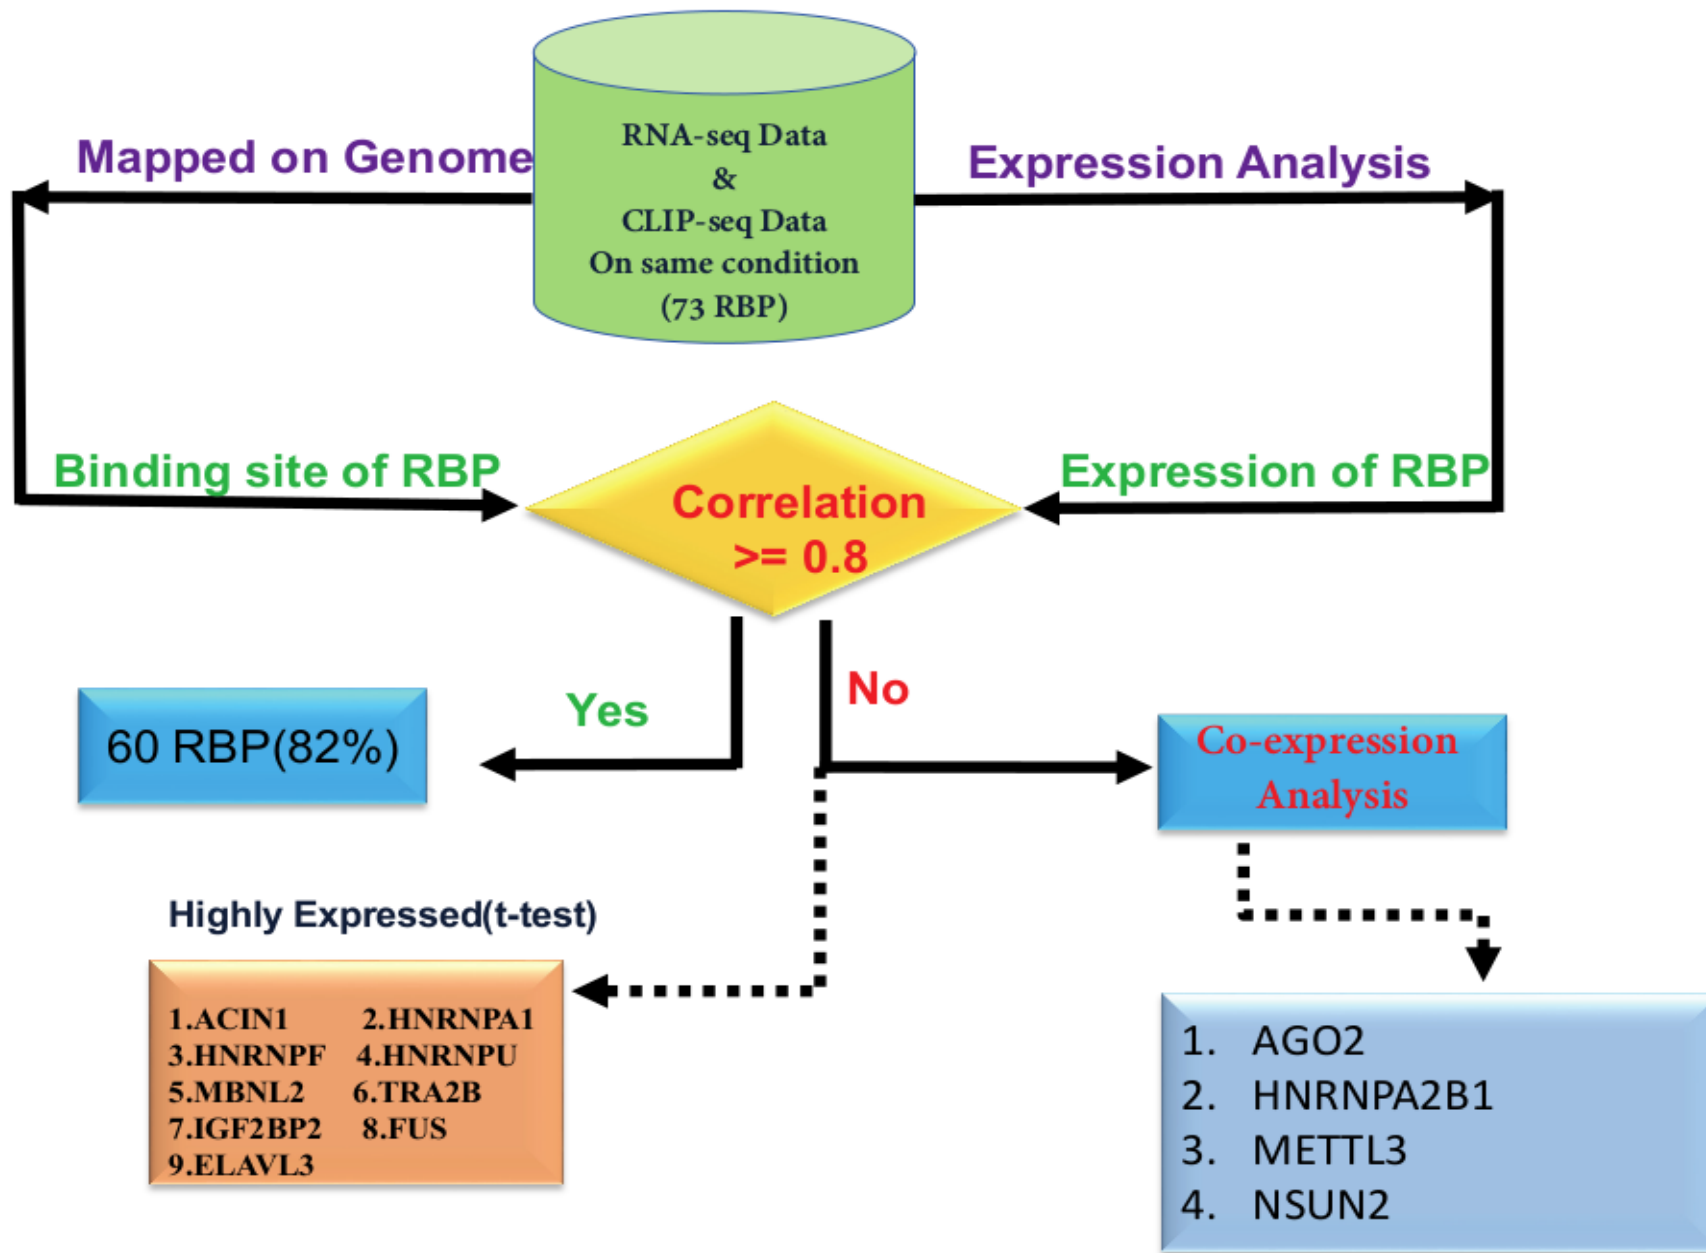

**Figure S5:** Binding sites of RBP strongly associated with its expression. The above diagram illustrates the detailed steps followed to establish the general association between binding site and expression of RBP. 60 RBPs out of 73 RBPs (82%) displayed significantly strong correlation between the RBP expression level and their CLIP-seq binding data, which indicates that expression has usually a positive association with degree of binding sites of RBP.
