# Supplementary material for: miRbiom: Machine-Learning on Bayesian Causal Nets of RBP-miRNA interactions successfully predicts miRNA profiles
Source: bioRxiv or medRxiv preprint supplement (doi:10.1101/2020.06.18.156851), 2021-09-07
Supplement: Supplementary file [file media-26.pdf]

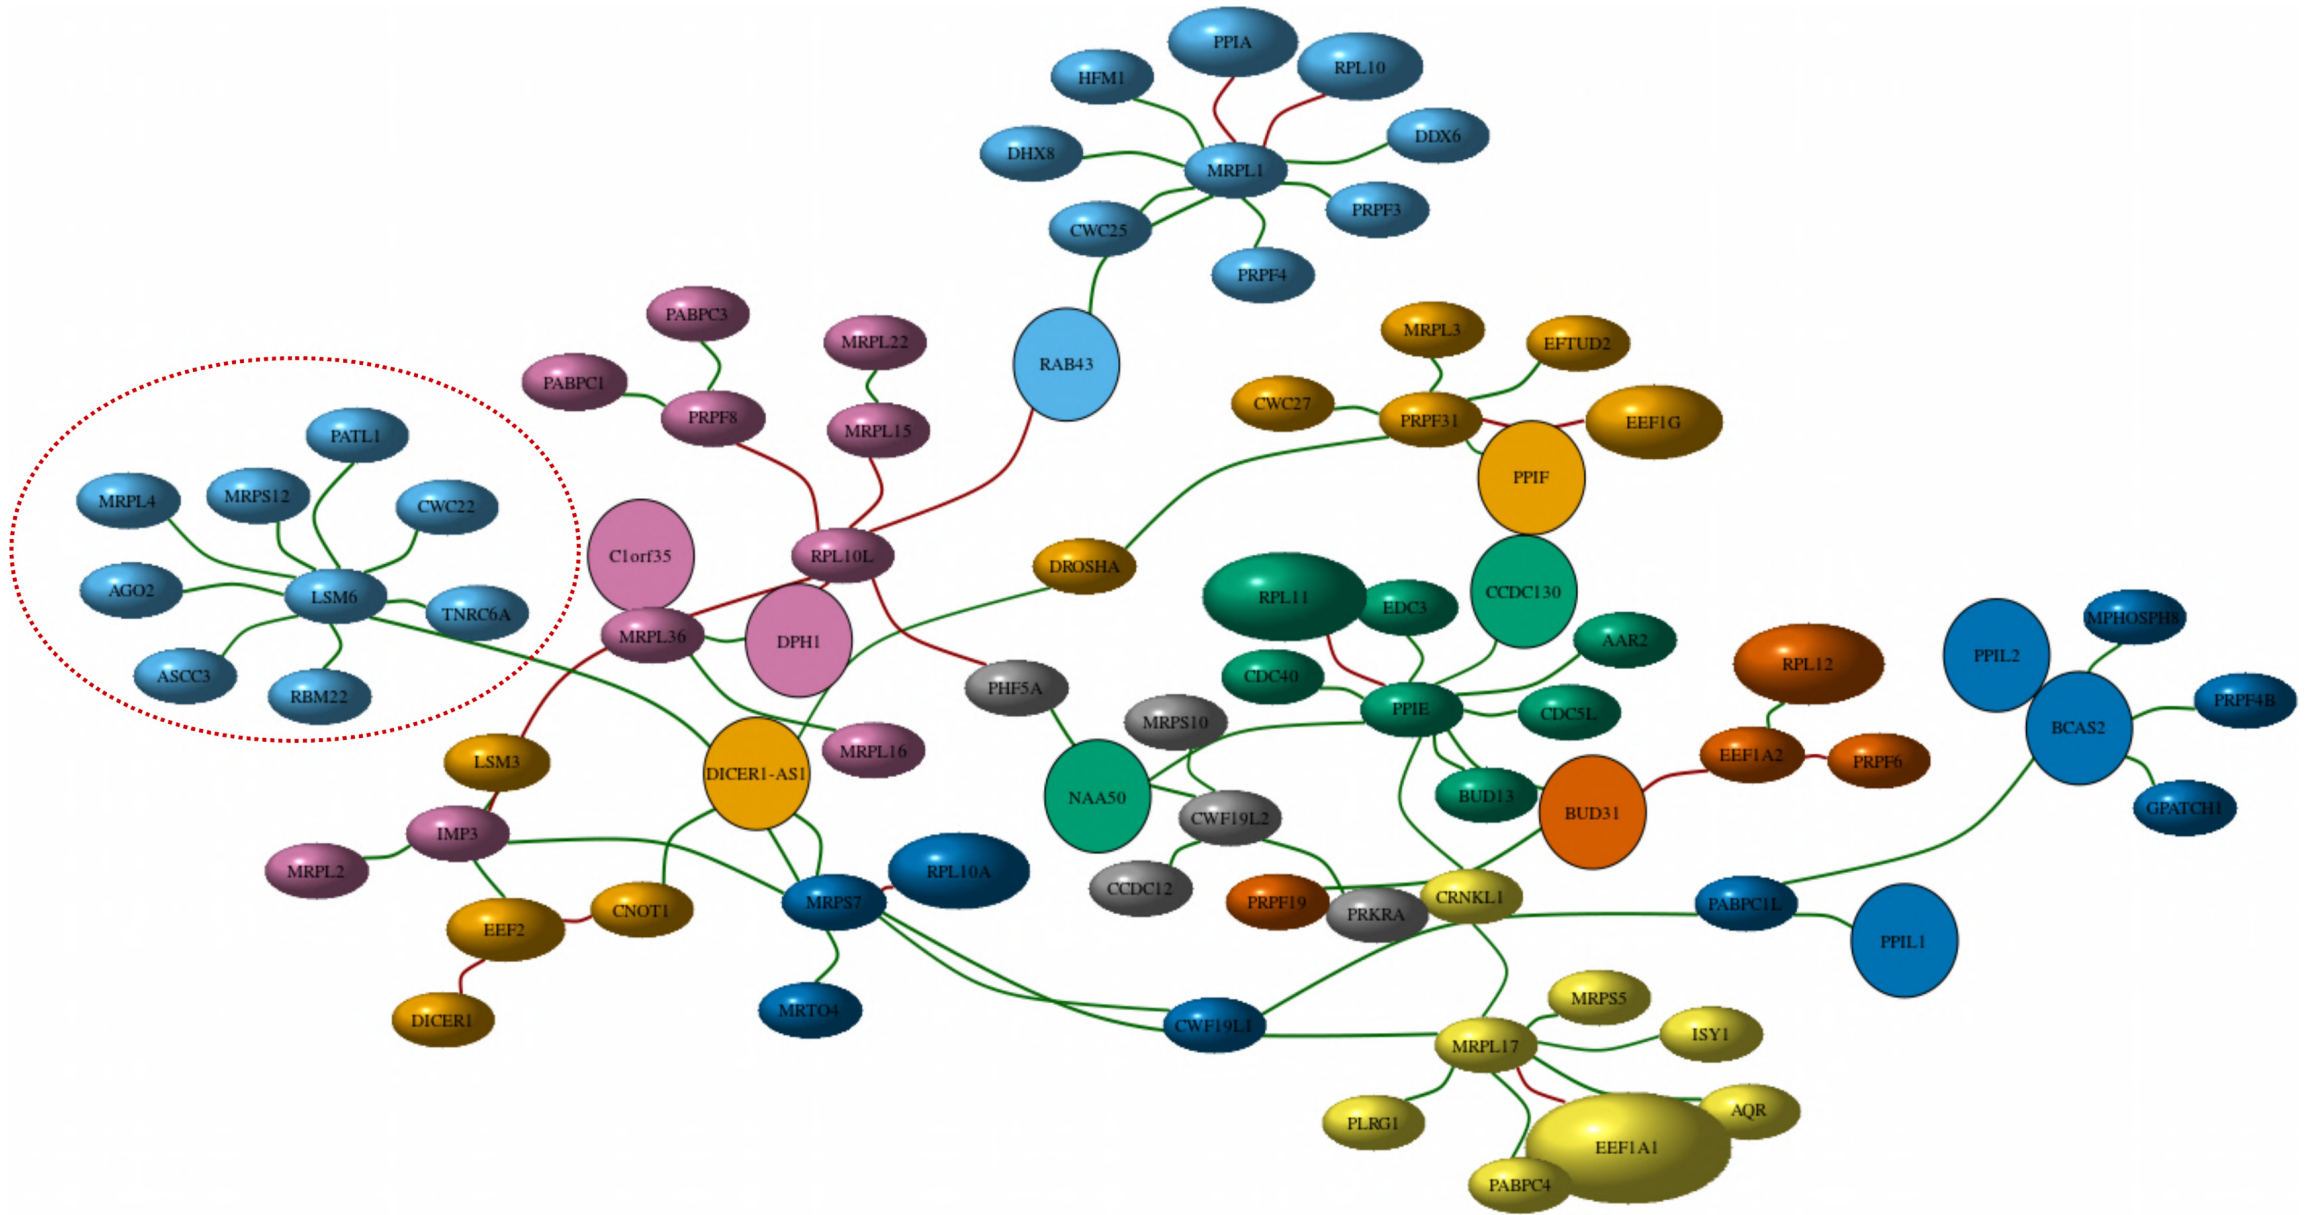

**Figure S6:** TNRC6A / GW182 is the essential RBP for binding of AGO2. From the network it was found that TNRC6A/GW182 played a crucial role in the binding of AGO2. AGO2 interaction with RNA was also found dependent upon another factor LSM6. During binding of AGO2, LSM6 also co-expressed and appears positively regulating AGO2. The favorable condition for AGO2 binding appears to when TNRC6A displays a positive association with LSM6. LSM6 also displays a positive association with AGO2.
