# Supplementary material for: miRbiom: Machine-Learning on Bayesian Causal Nets of RBP-miRNA interactions successfully predicts miRNA profiles
Source: bioRxiv or medRxiv preprint supplement (doi:10.1101/2020.06.18.156851), 2021-09-07
Supplement: Supplementary file [file media-27.pdf]

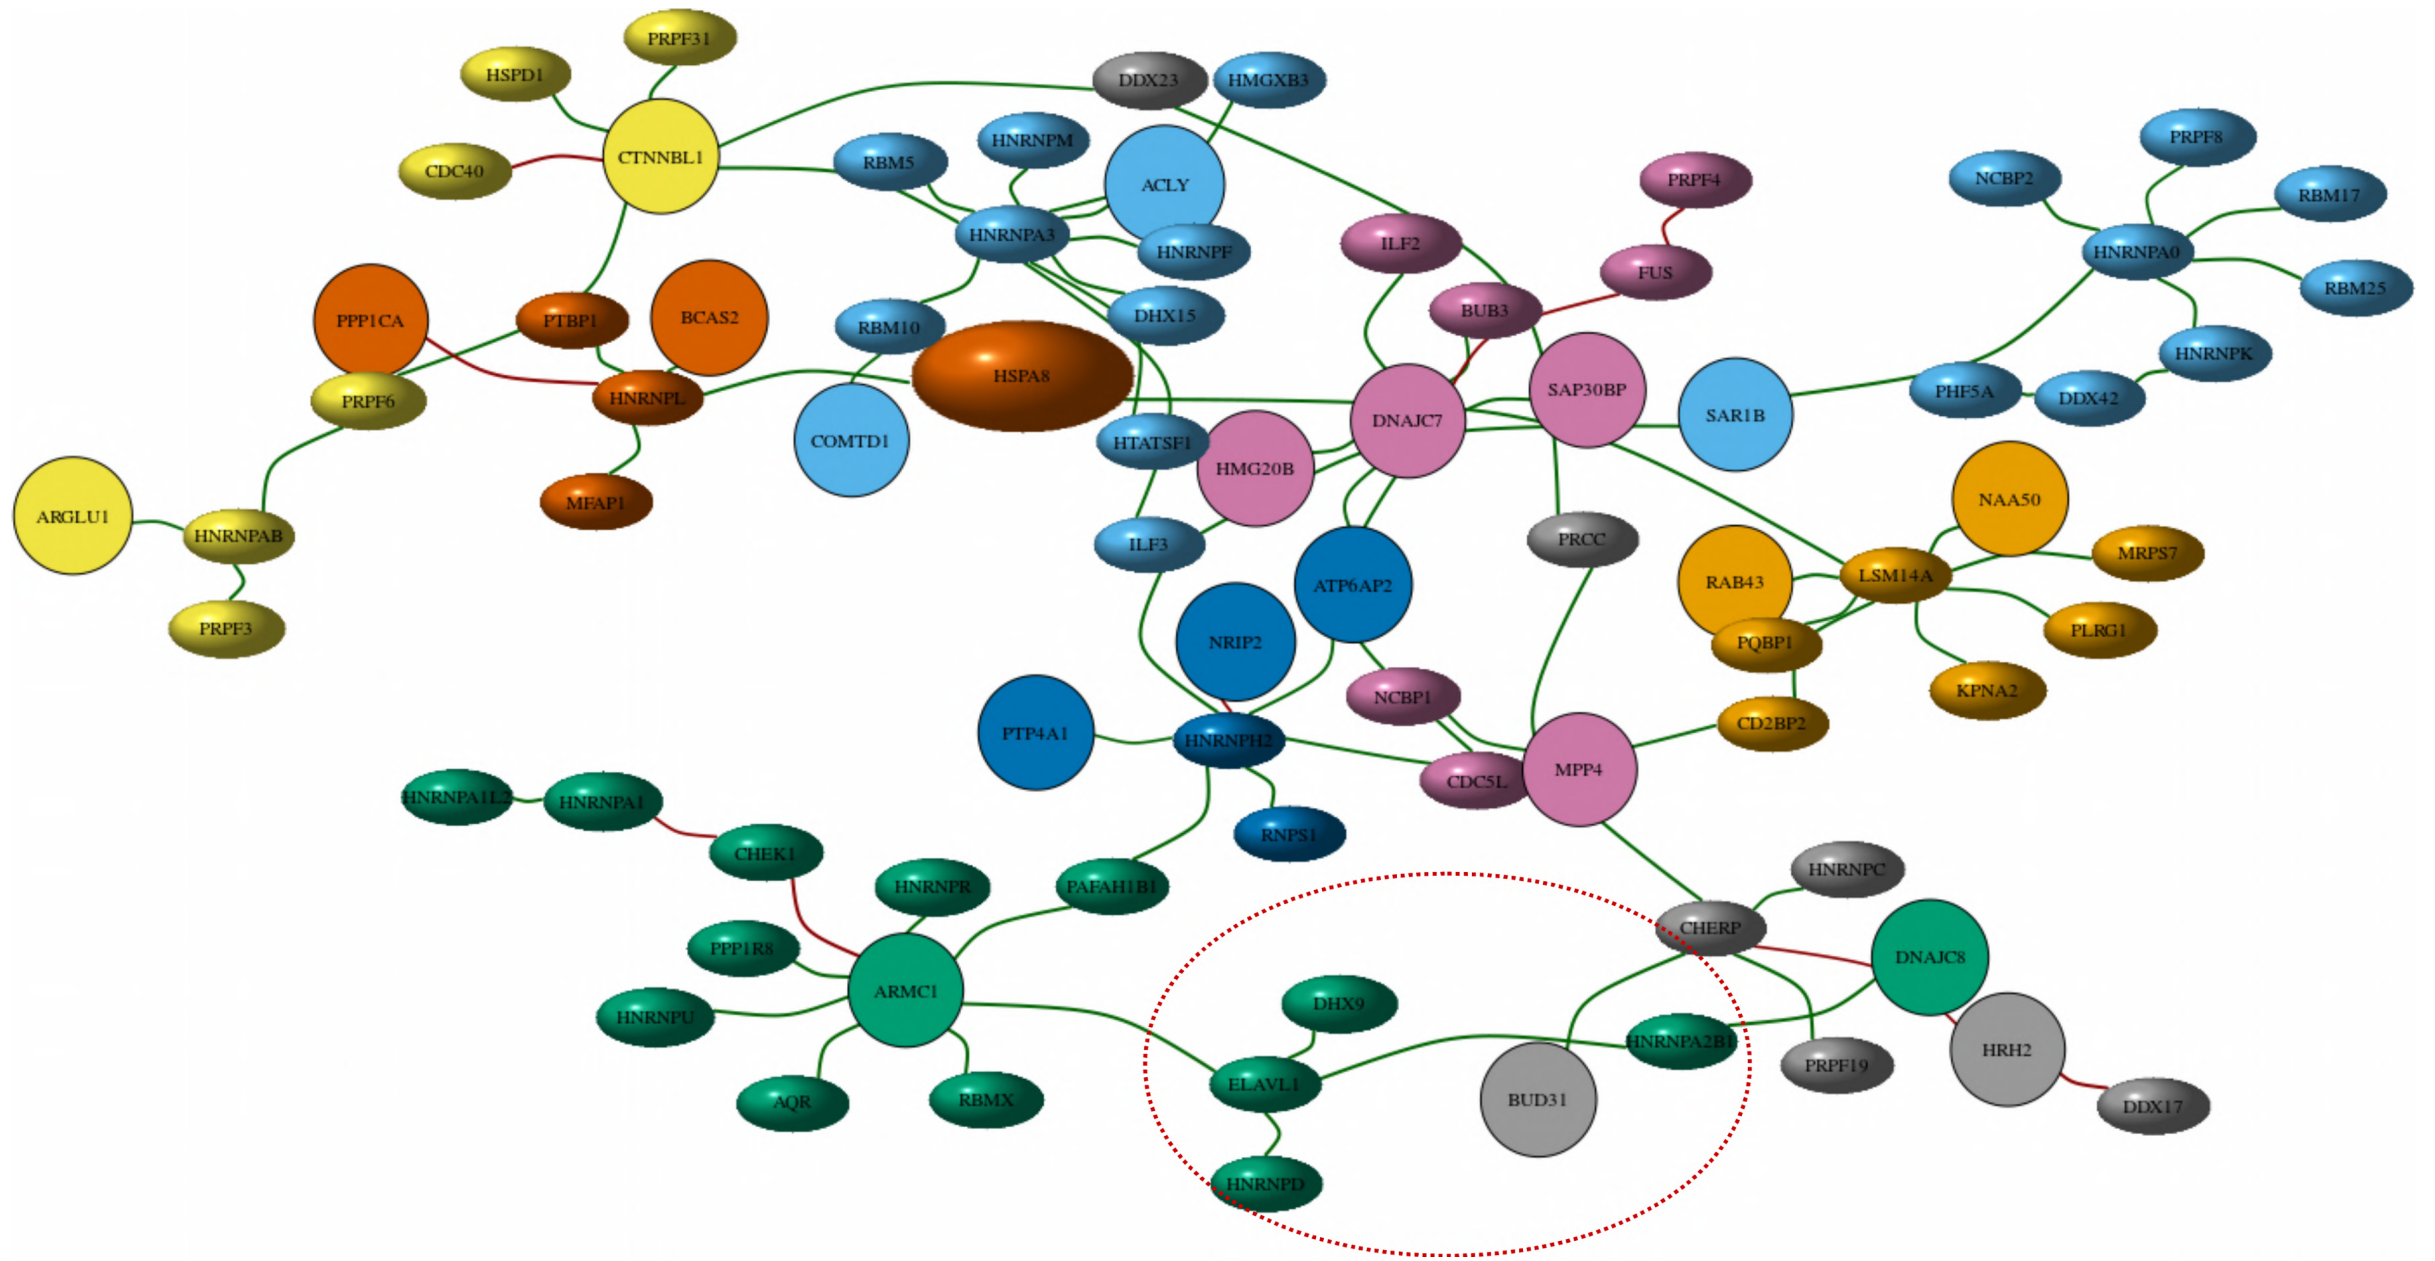

**Figure S7:** ELAVL1 played a important role in binding of HNRNPA2B1. From the co-expression network analysis, it was found that ELAVL1 plays a positive role in binding of HNRNPA1B2. However, at lower expression ELAVL1 does not show any positive association with HNRNPA2B1.
