# Supplementary material for: miRbiom: Machine-Learning on Bayesian Causal Nets of RBP-miRNA interactions successfully predicts miRNA profiles
Source: bioRxiv or medRxiv preprint supplement (doi:10.1101/2020.06.18.156851), 2021-09-07
Supplement: Supplementary file [file media-28.pdf]

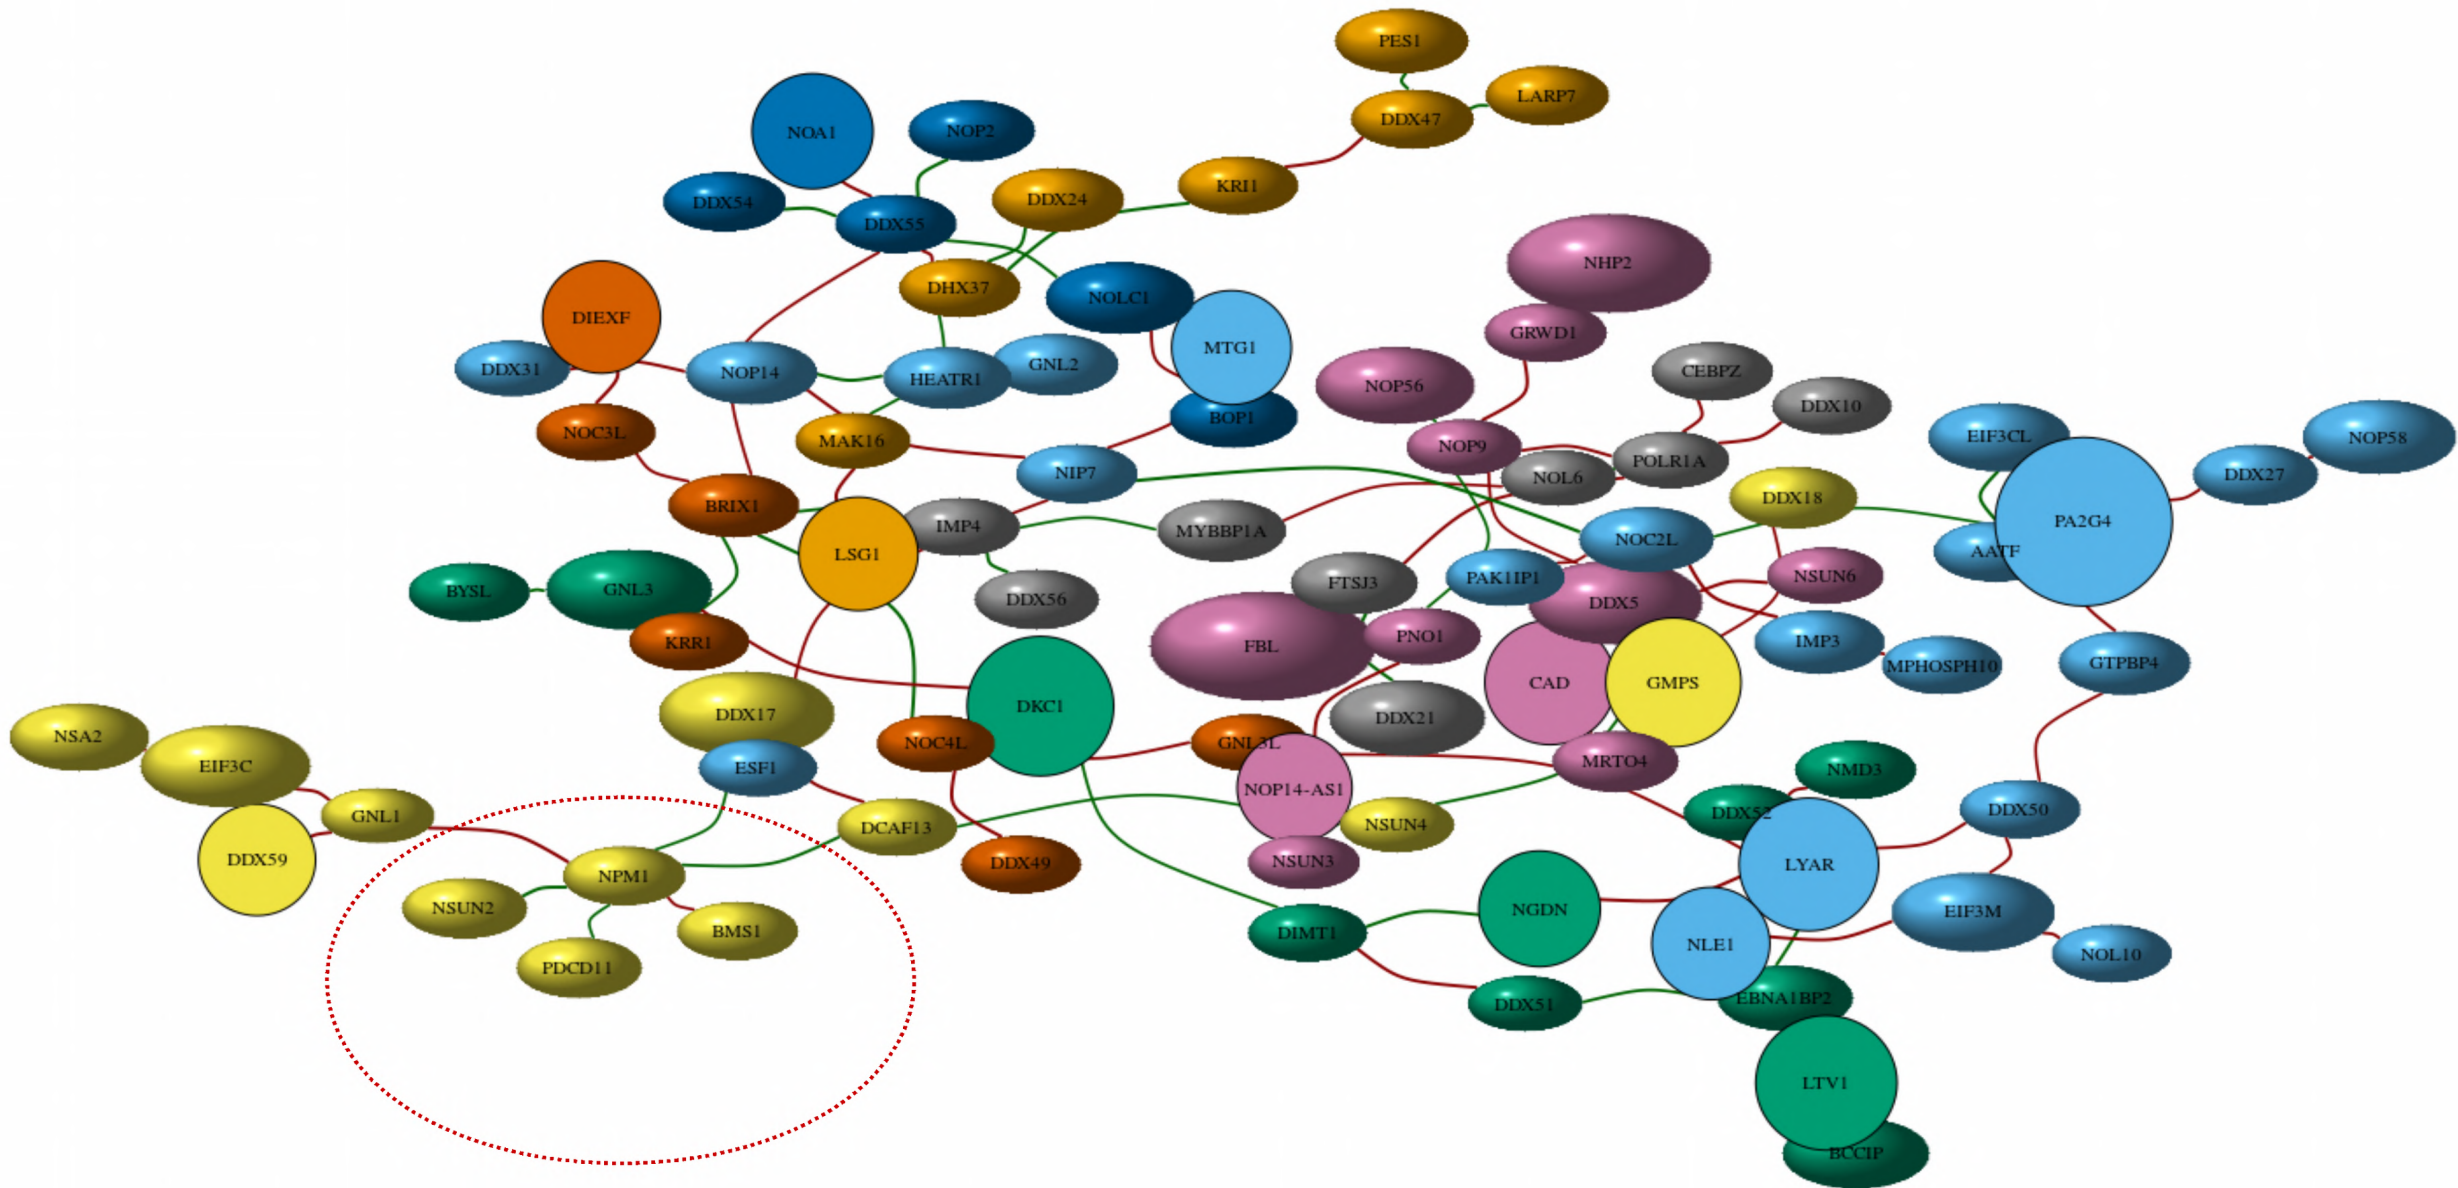

**Figure S8:** NPM1 is essential for binding of NSUN2. From the co expression network analysis of NSUN2, it was found that NPM1 has strong positive association with NSUN2.
