# Supplementary material for: miRbiom: Machine-Learning on Bayesian Causal Nets of RBP-miRNA interactions successfully predicts miRNA profiles
Source: bioRxiv or medRxiv preprint supplement (doi:10.1101/2020.06.18.156851), 2021-09-07
Supplement: Supplementary file [file media-30.pdf]

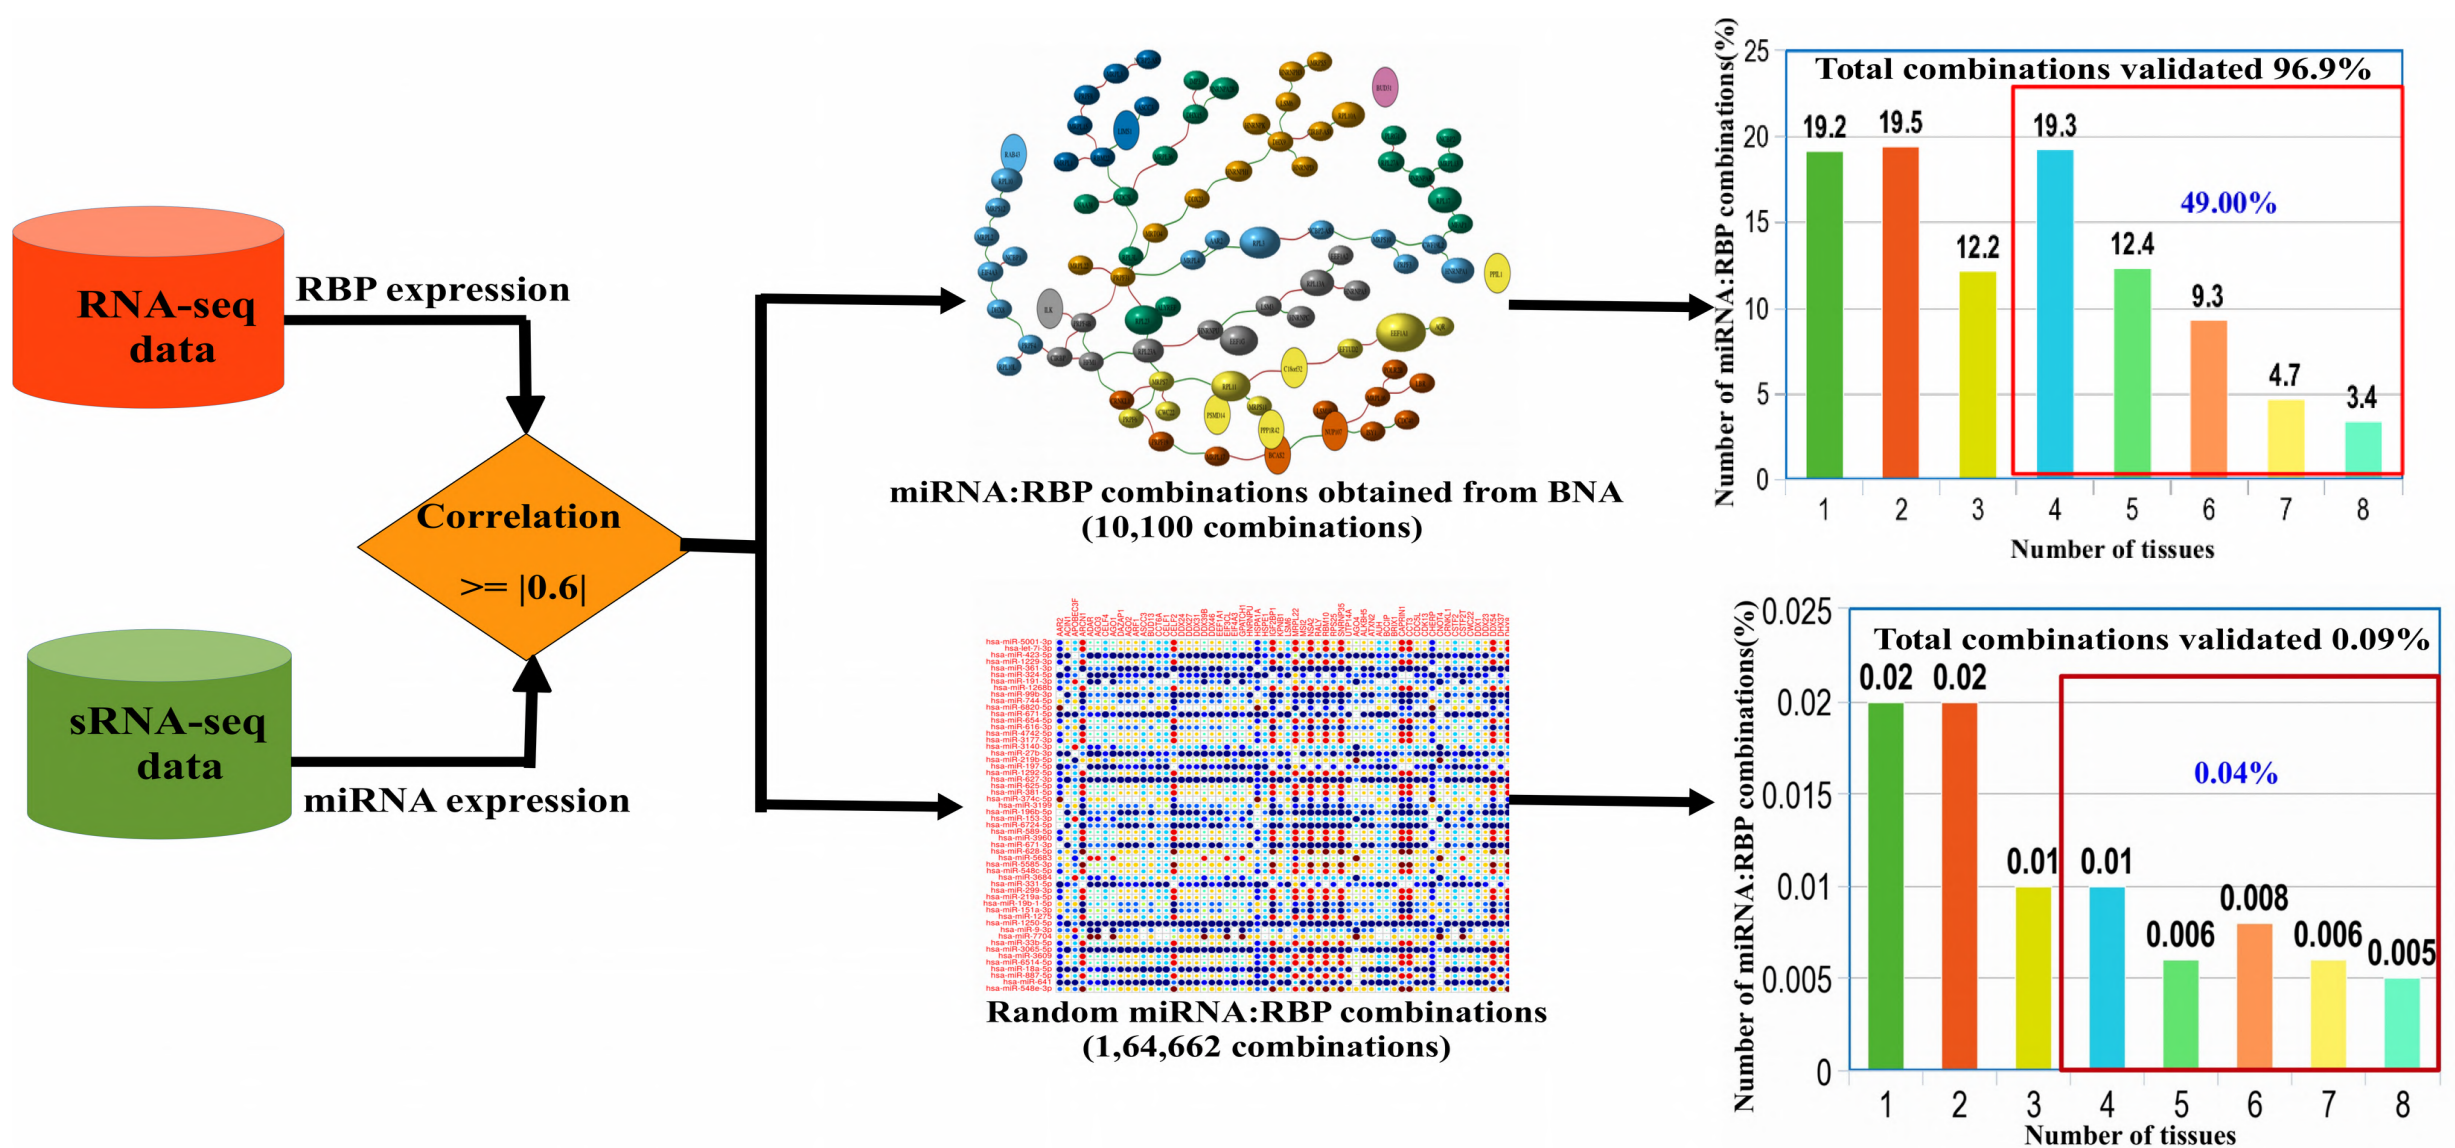

**Figure S10:** Validation of different miRNA:RBP combinations in eight different independent normal tissues. The above diagram describes the procedure followed to validate mature miRNAs and RBPs combinations obtained from our study in eight different independent normal tissue (Bladder, Brain, Breast, Lungs, Pancreas, Placenta and Testis). The bar-chart showed the distribution of unique miRNA:RBP pairs overlapping across different tissues. A total of 96.9% miRNA:RBP combinations were validated across all the eight tissue. Where as 49% miRNA:RBP combinations exist in four or more tissue. Also the significant existence of miRNA:RBP combinations were compared to a random dataset. Only 0.09% of random miRNA:RBP combinations were validated, and 0.04% miRNA:RBP random combinations exists in four or more tissue.
