# Supplementary material for: miRbiom: Machine-Learning on Bayesian Causal Nets of RBP-miRNA interactions successfully predicts miRNA profiles
Source: bioRxiv or medRxiv preprint supplement (doi:10.1101/2020.06.18.156851), 2021-09-07
Supplement: Supplementary file [file media-31.pdf]

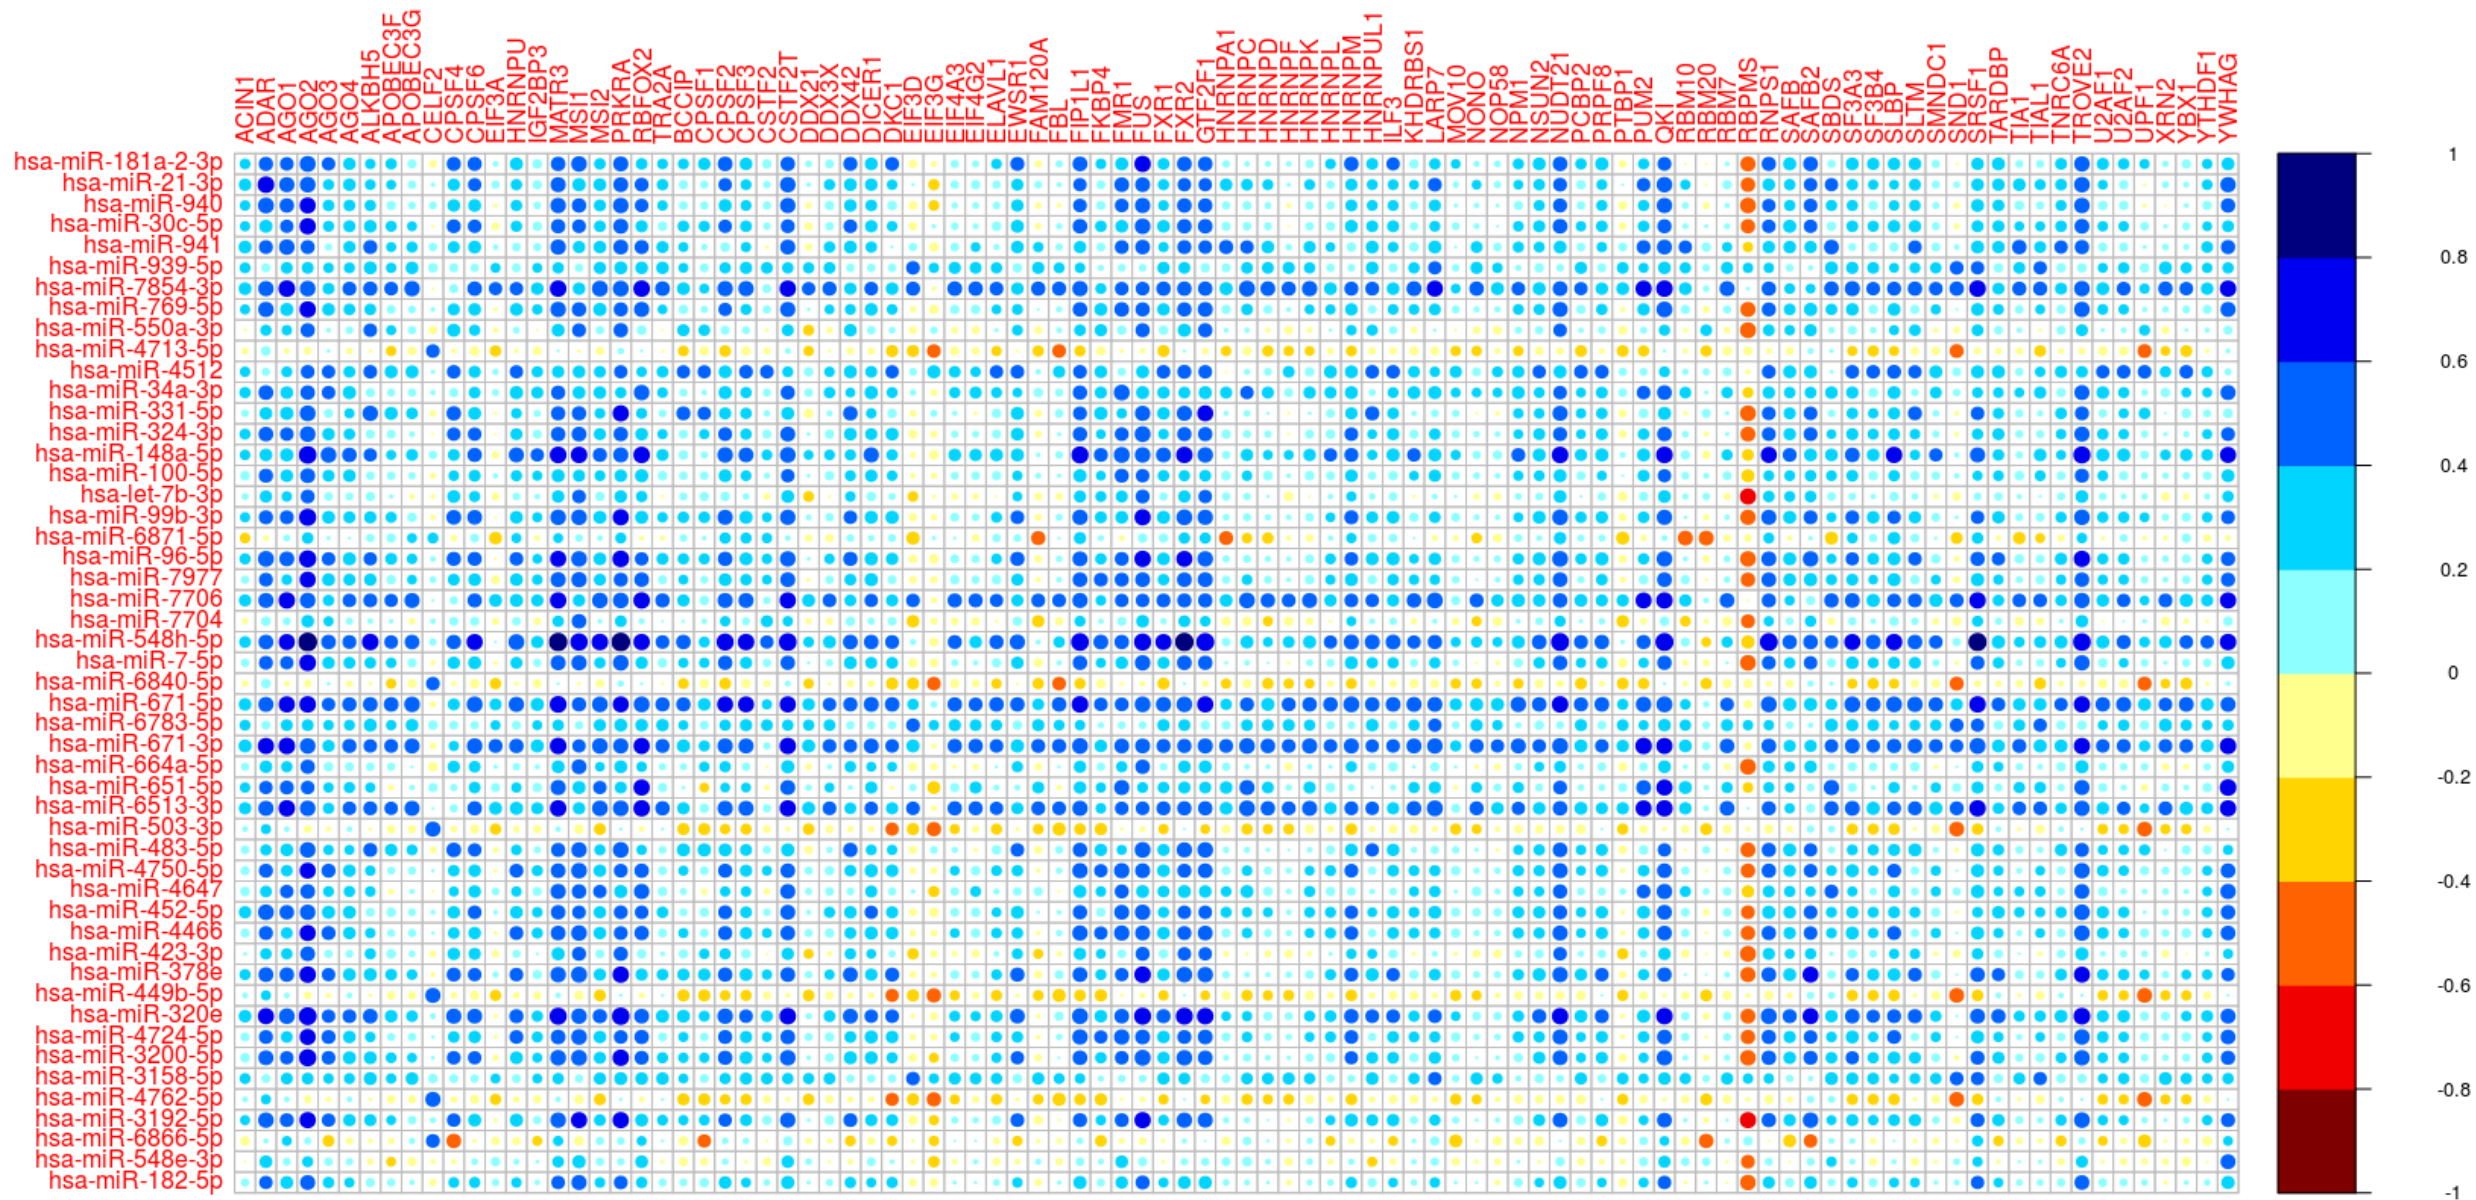

**Figure S11:** Visualization of miRNA:RBP association using corr-gram plot for 50 randomly selected miRNA. This corr-plot showed the association of RBPs in mature miRNAs processing from pre-miRNA combining all eight tissue together. To visualize the association of miRNA with RBP considering all eight tissues, a corr-gram plot was prepared. The mature miRNA and RBP combinations discovered in the current study, also showed similar association in other tissues.
