# Supplementary material for: miRbiom: Machine-Learning on Bayesian Causal Nets of RBP-miRNA interactions successfully predicts miRNA profiles
Source: bioRxiv or medRxiv preprint supplement (doi:10.1101/2020.06.18.156851), 2021-09-07
Supplement: Supplementary file [file media-32.pdf]

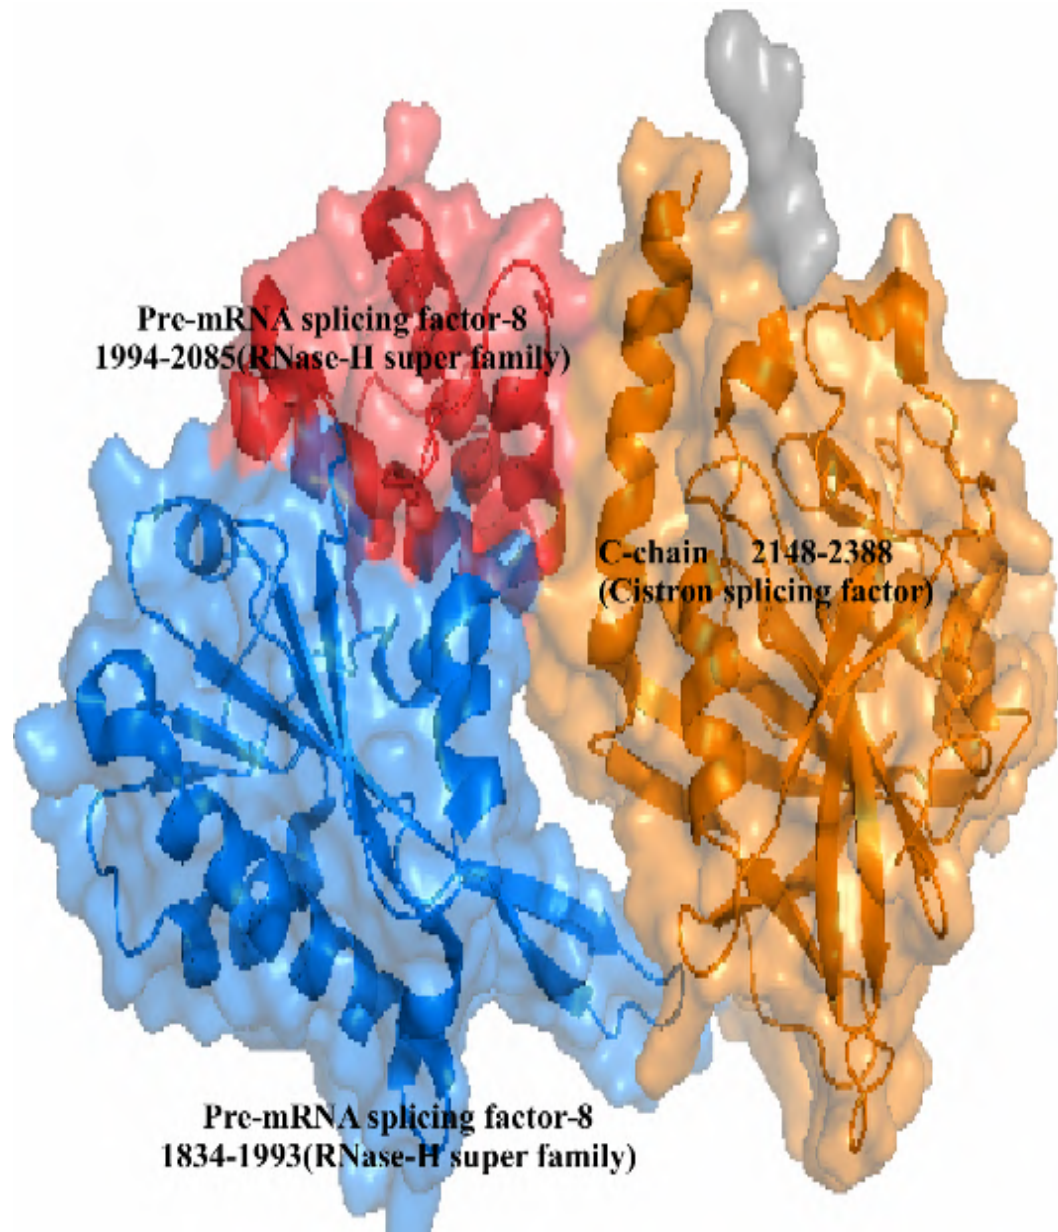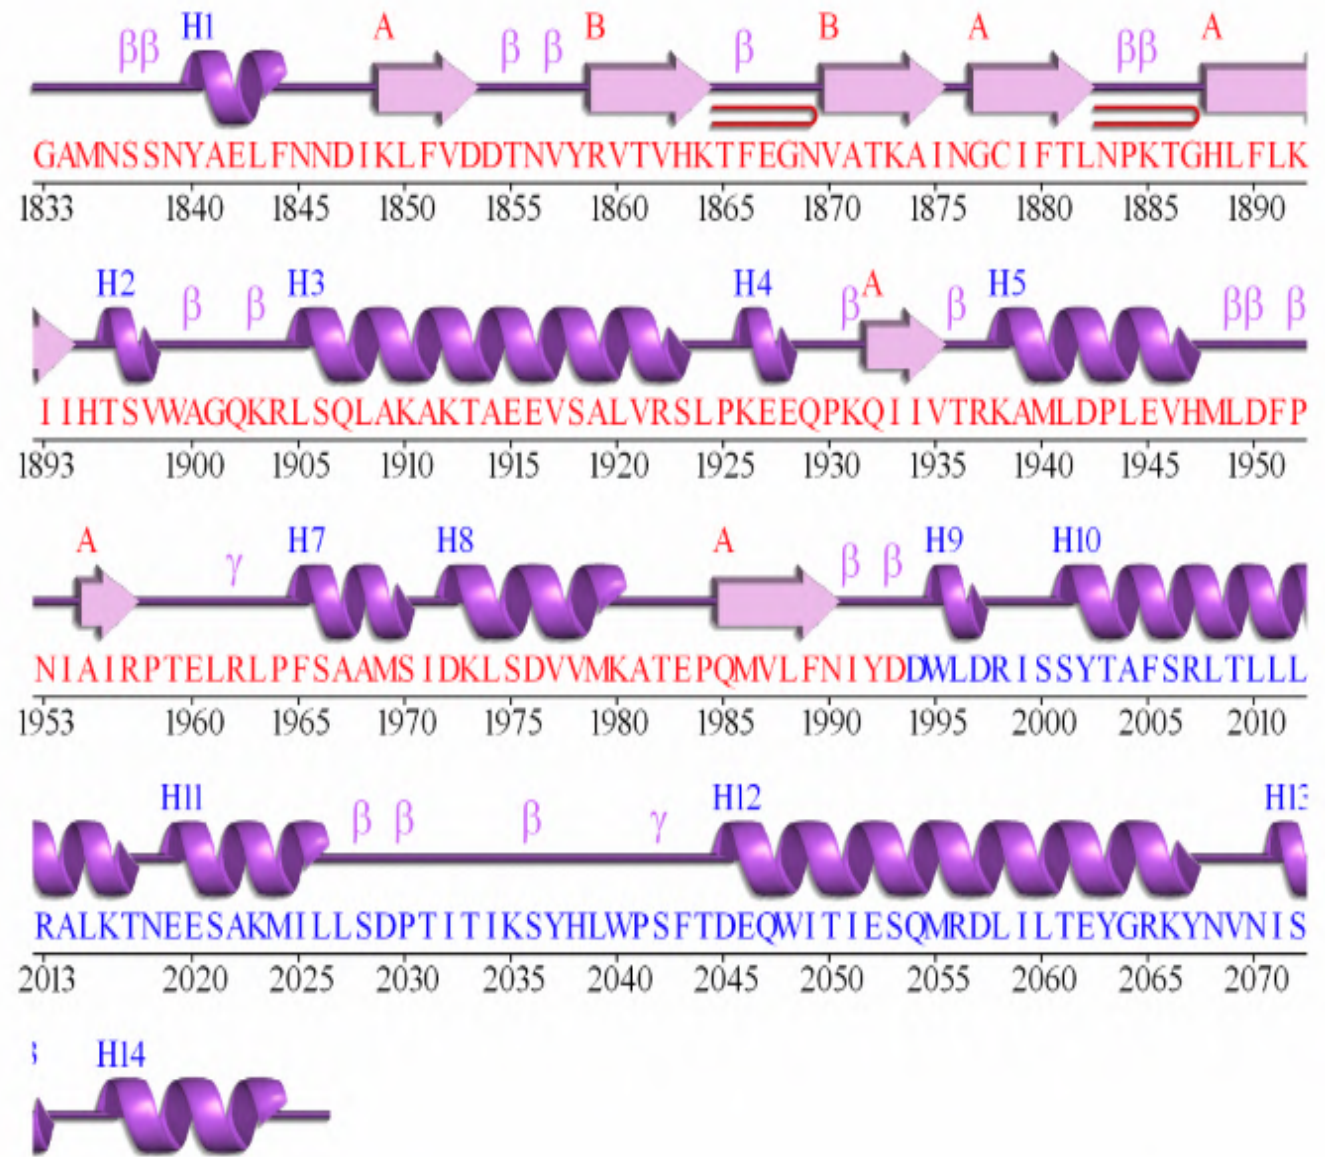

**Figure S12:** AAR2 emerges as the most associated RBP to the miRNAs. 3D cartoon image of AAR2 protein (PDB-id-4ilg-B and C chain of 2.1 Angstrom.) along with domain organization is presented here. Different color scheme along with number range represent position of domain. Blue and red cage of polypeptide belong to B-chain and the orange cage belongs to C-chain. This protein contains pre-mRNA splicing factor-8 both in A and B-chain of its trimeric structure and belongs to ribonuclease-H superfamily.
