# Supplementary material for: miRbiom: Machine-Learning on Bayesian Causal Nets of RBP-miRNA interactions successfully predicts miRNA profiles
Source: bioRxiv or medRxiv preprint supplement (doi:10.1101/2020.06.18.156851), 2021-09-07
Supplement: Supplementary file [file media-33.pdf]

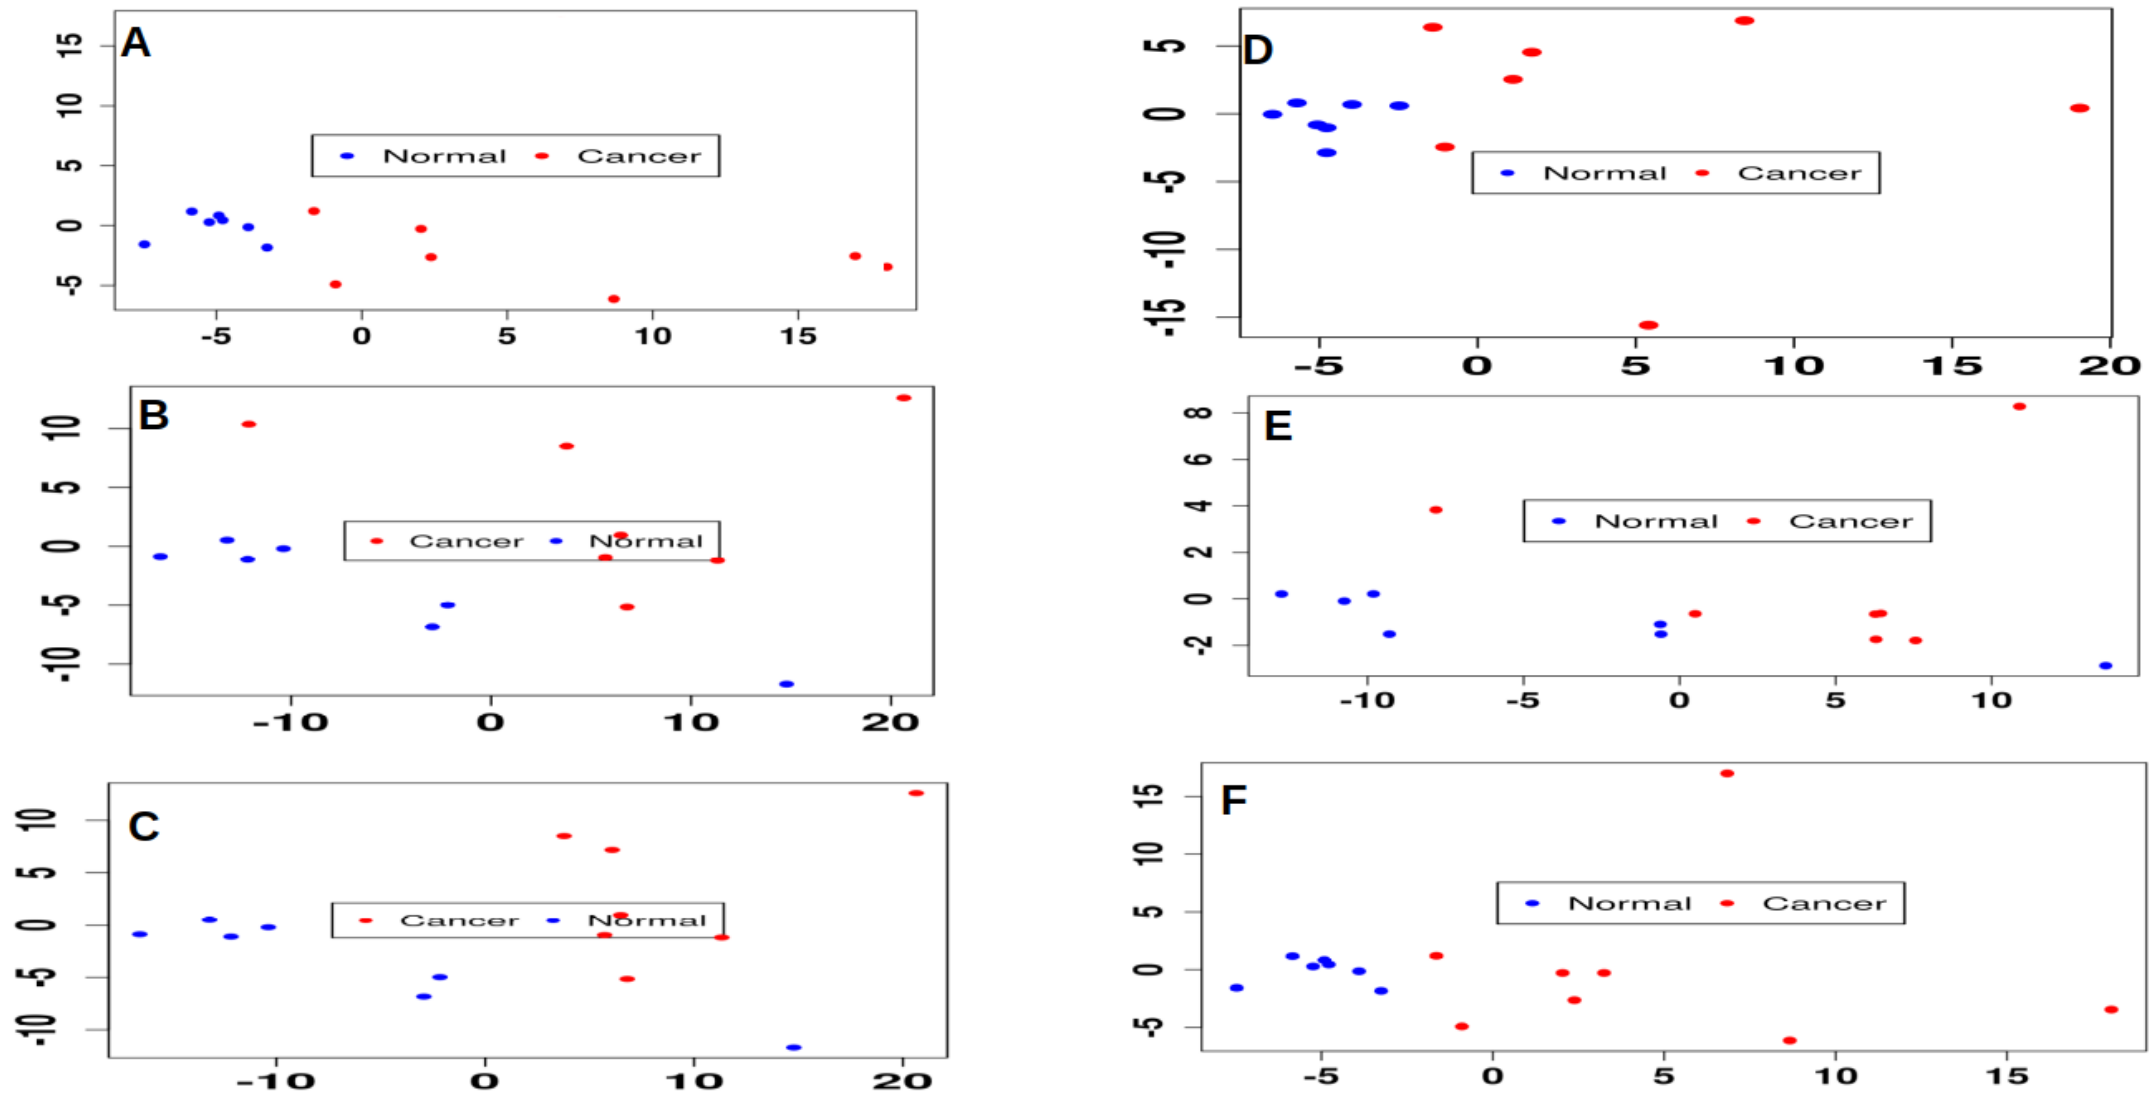

**A.** Total miRNAs; **B.** Total RBPs; **C.** Total miRNAs + Total RBPs; **D.** miRNA excluding common; **E.** RBPs involved in miRNAs Processing excluding common; **F.** RBPs involved in miRNAs Processing excluding common + miRNAs excluding common.

**Figure S13:** RBPs can act as bio-markers in distinguishing cell states. This set of plots display the classification of lungs cancer and lungs normal tissue samples based on miRNA and RBP expression using k-means clustering. It emerges that RBPs associated with miRNA were able to distinguish between the conditions sharply. The associated miRNAs gave similar results. RBPs and associated miRNAs can replace each other as biomarkers.
