# Supplementary material for: miRbiom: Machine-Learning on Bayesian Causal Nets of RBP-miRNA interactions successfully predicts miRNA profiles
Source: bioRxiv or medRxiv preprint supplement (doi:10.1101/2020.06.18.156851), 2021-09-07
Supplement: Supplementary file [file media-34.pdf]

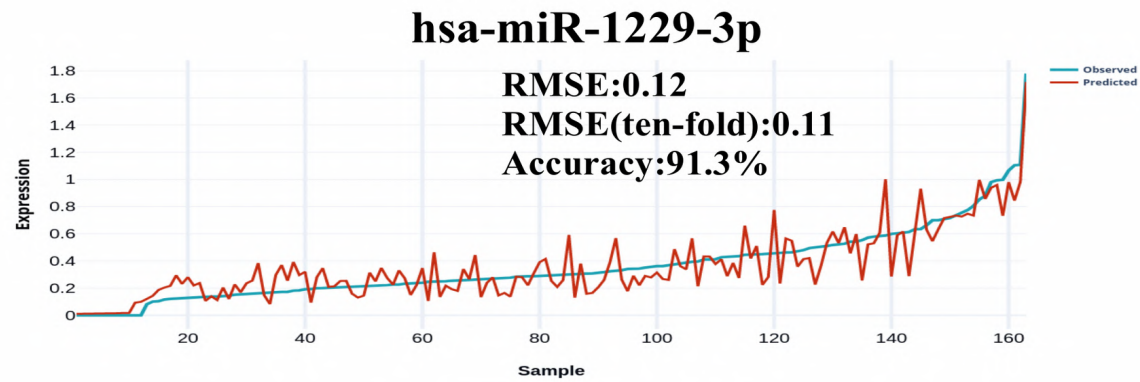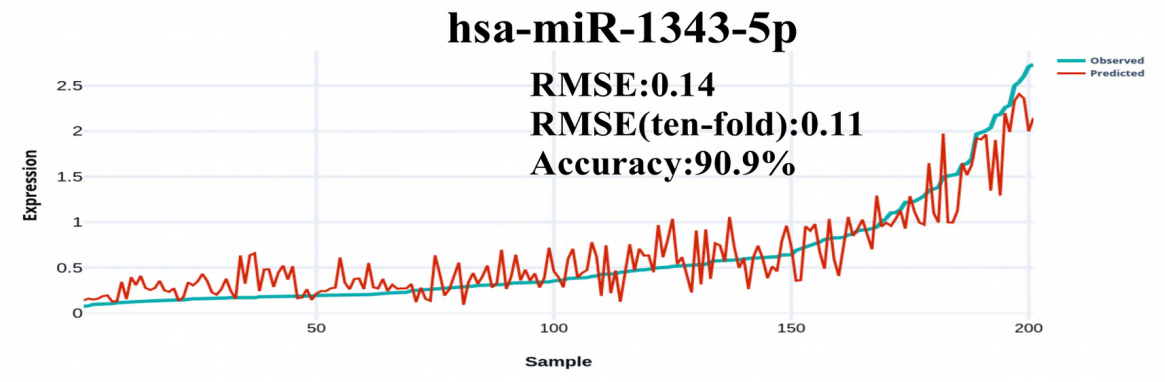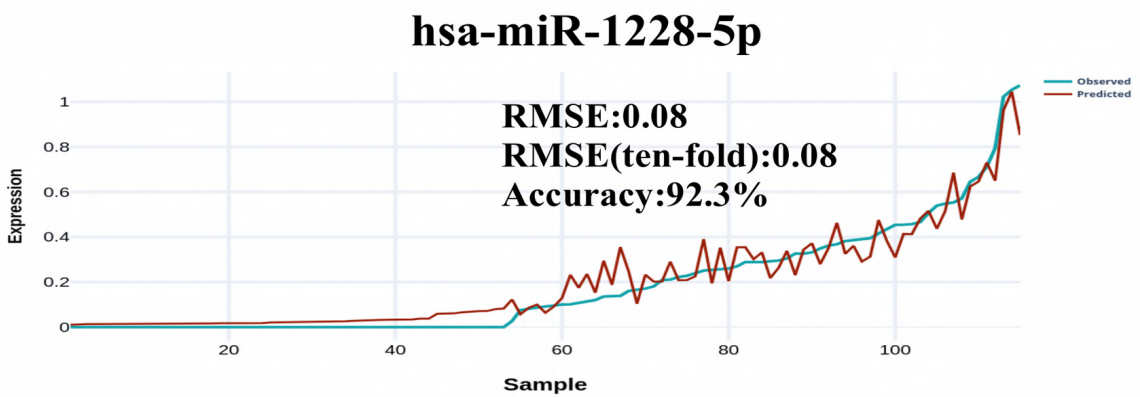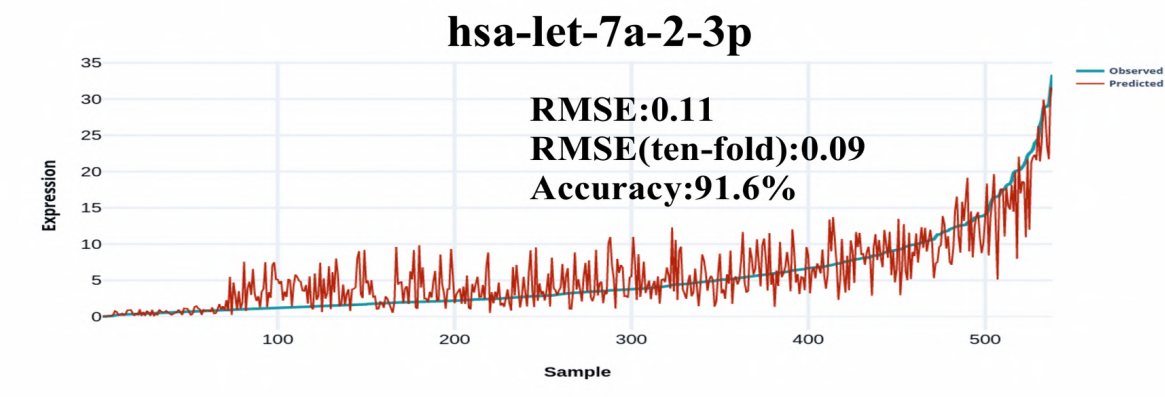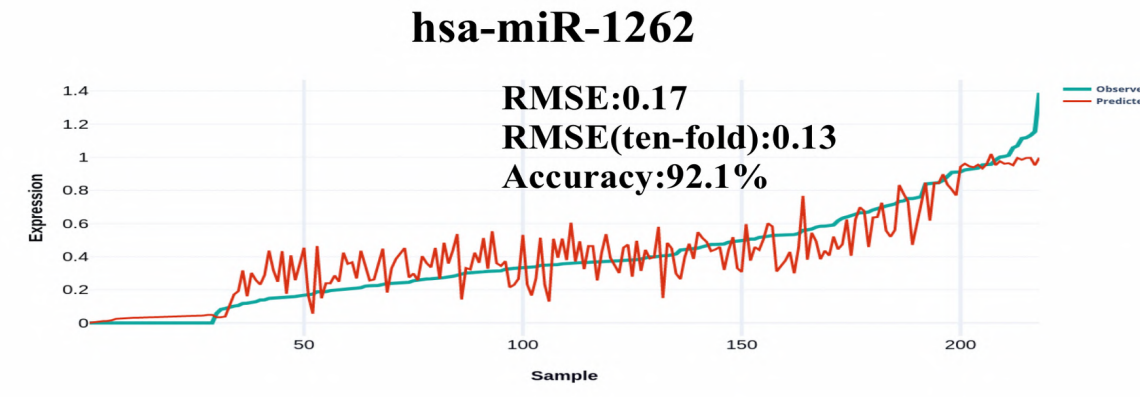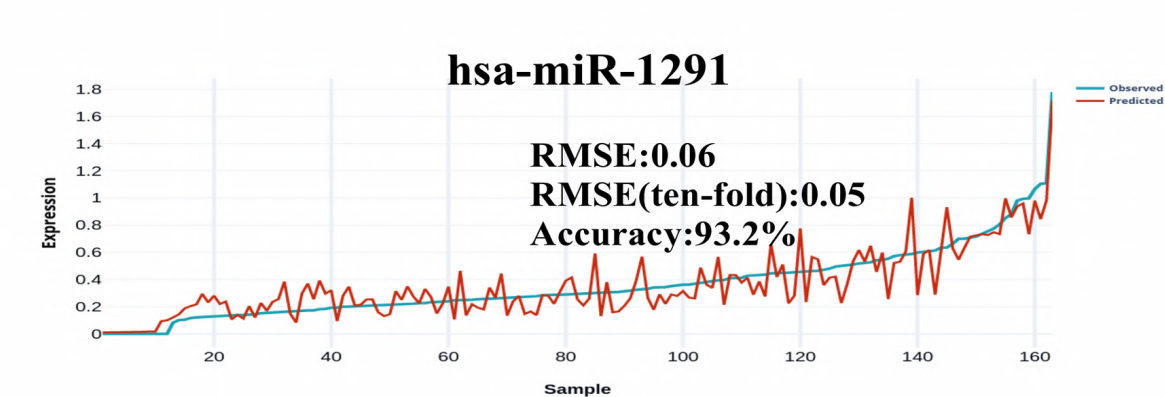

**Figure S14:**RBP expression data is enough to predict miRNA and their expression .The miRNA expression level was predicted from the RNA-seq gene expression data using XGBoost regression based on the expression of RBP. The model accuracy was tested based on the RMSE and RMAPE. Where as to check the model consistency a ten-fold cross-validation was used and consistency measured based on RMSE. The observed and predicted expression levels obtained from the XGBoost regression model for six miRNAs were presented in above figure.
