# Supplementary material for: miRbiom: Machine-Learning on Bayesian Causal Nets of RBP-miRNA interactions successfully predicts miRNA profiles
Source: bioRxiv or medRxiv preprint supplement (doi:10.1101/2020.06.18.156851), 2021-09-07
Supplement: Supplementary file [file media-39.pdf]

# Bacterial Transformation

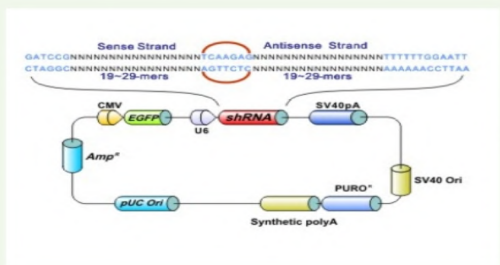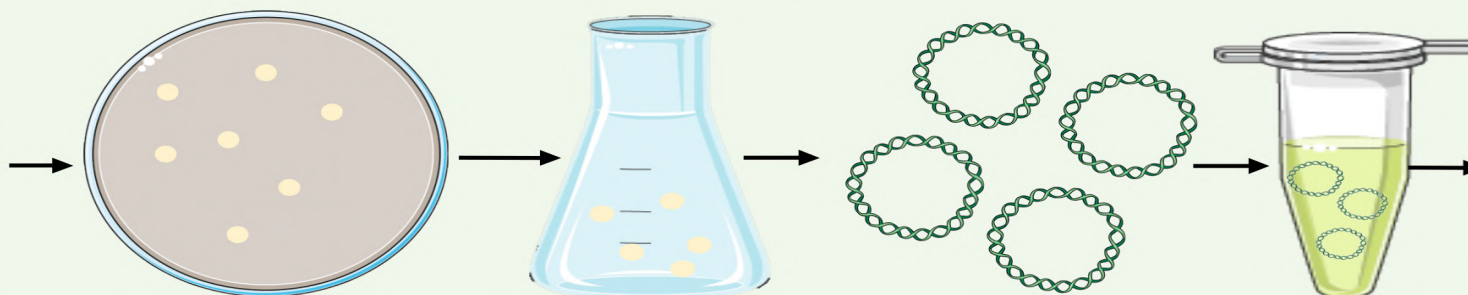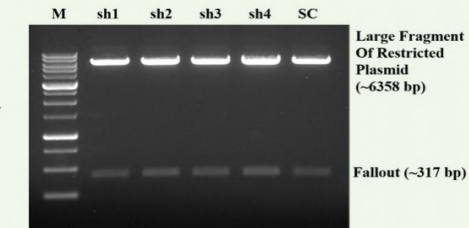

shRNA plasmid targeting  
DICER and AAR2

Bacterial transformation and  
culture

Isolation of plasmid and  
restriction digestion

# Transfection and Gene Knockdown

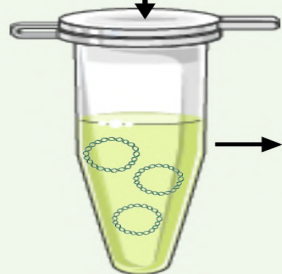

Transformed Cells

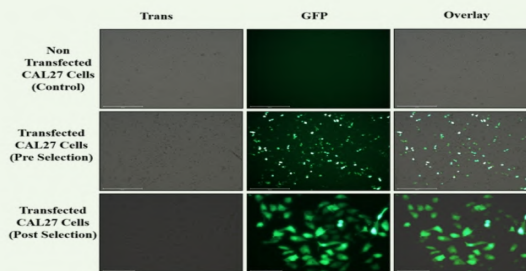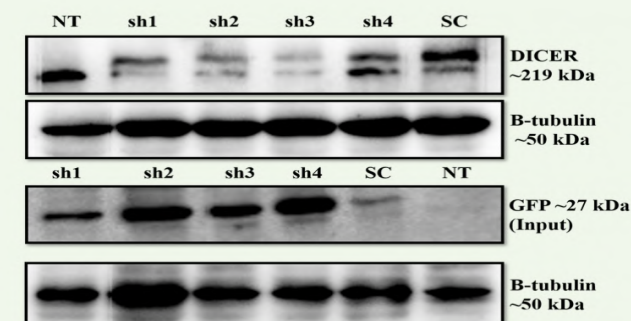

Transfection in CAL27 cell line  
and selection of transformants

Confirmation of knockdown through fluorescence microscopic  
imaging and immunoblotting

Transformed DICER -/-  
and AAR2 -/- CAL27 cells

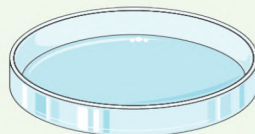

Mature miRNA level Detection

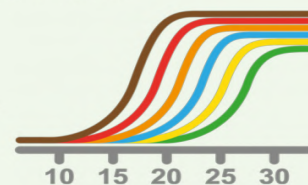

Isolation of miRNA, cDNA  
conversion, end point PCR  
and qPCR

Figure S19: Study schemes. Schematic representation of the study depicting the workplan and consecutive steps.
